# Supplementary material for: Assessing the short-term outcomes of a community-based intervention for overweight and obese children: The MEND 5-7 programme
Source: PubMed Central journal article supplement — BMJ Open. 2013 May 3;3(5):e002607. doi: 10.1136/bmjopen-2013-002607 (PMC3646180; doi:10.1136/bmjopen-2013-002607), 2013-05-03
Supplement: bmjopen-2013-002607.draft_revisions.pdf [file bmjopen-2013-002607.draft_revisions.pdf]

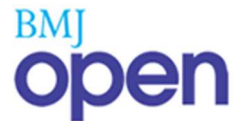

**Assessing the short-term effects of a scalable, community-based intervention for overweight and obese children: The MEND 5-7 programme.**

|                                 |                                                                                                                                                                                                                                                                                                                                                                                                                                                                                                                                                                                                                 |
|---------------------------------|-----------------------------------------------------------------------------------------------------------------------------------------------------------------------------------------------------------------------------------------------------------------------------------------------------------------------------------------------------------------------------------------------------------------------------------------------------------------------------------------------------------------------------------------------------------------------------------------------------------------|
| Journal:                        | <i>BMJ Open</i>                                                                                                                                                                                                                                                                                                                                                                                                                                                                                                                                                                                                 |
| Manuscript ID:                  | bmjopen-2013-002607                                                                                                                                                                                                                                                                                                                                                                                                                                                                                                                                                                                             |
| Article Type:                   | Research                                                                                                                                                                                                                                                                                                                                                                                                                                                                                                                                                                                                        |
| Date Submitted by the Author:   | 17-Jan-2013                                                                                                                                                                                                                                                                                                                                                                                                                                                                                                                                                                                                     |
| Complete List of Authors:       | Smith, Lindsey; University College London, Institute of Child Health, Childhood Nutrition Research Centre; MEND Central Ltd, Chadwick, Paul; Cancer Research, University College London, UK Health Behaviour Unit; MEND Central Ltd, Radley, Duncan; University College London, Institute of Child Health, Childhood Nutrition Research Centre; MEND Central Ltd, Kolotourou, Maria; MEND Central Ltd, Gammon, Catherine; MEND Central Ltd, Rosborough, Jennifer; MEND Central Ltd, Sacher, Paul; MEND Central Ltd, ; University College London, Institute of Child Health, Childhood Nutrition Research Centre |
| <b>Primary Subject Heading</b>: | Public health                                                                                                                                                                                                                                                                                                                                                                                                                                                                                                                                                                                                   |
| Secondary Subject Heading:      | Paediatrics                                                                                                                                                                                                                                                                                                                                                                                                                                                                                                                                                                                                     |
| Keywords:                       | Community child health < PAEDIATRICS, PUBLIC HEALTH, PAEDIATRICS                                                                                                                                                                                                                                                                                                                                                                                                                                                                                                                                                |
|                                 |                                                                                                                                                                                                                                                                                                                                                                                                                                                                                                                                                                                                                 |

SCHOLARONE™  
Manuscripts

1  
2  
3  
4  
5  
6  
7  
8  
9  
10  
11  
12 **Assessing the short-term effects of a scalable, community-based intervention for**  
13 **overweight and obese children: The MEND 5-7 programme.**  
14

15  
16 Smith LR<sup>1,2</sup>, Chadwick P<sup>2,3</sup>, Radley D<sup>1,2</sup>, Kolotourou M<sup>2</sup>, Gammon CS<sup>2</sup>, Rosborough J<sup>2</sup>,  
17 Sacher PM<sup>1,2</sup>,  
18

19 *<sup>1</sup>Childhood Nutrition Research Centre, Institute of Child Health, University College London,*  
20 *United Kingdom. <sup>2</sup>MEND Central, United Kingdom. <sup>3</sup>Cancer Research, UK Health Behaviour*  
21 *Unit, University College London, United Kingdom.*  
22  
23  
24  
25

26 **Corresponding author:** PM Sacher, MEND Central Ltd, Unit 21 Tower Workshops, 58 Riley  
27

28 Road, London, SE1 3DG. Telephone: 020 7231 7225, Fax: 020 7394 7616, Email:  
29

30 paul.sacher@mendcentral.org.  
31  
32  
33  
34  
35

36 Keywords: childhood, obesity, intervention, community programme  
37

38 Word count: 2,977  
39  
40  
41  
42  
43  
44  
45  
46  
47  
48  
49  
50  
51  
52  
53  
54  
55  
56  
57  
58  
59  
60

**ABSTRACT**

**Objective** The aim of this study was to report outcomes of the UK service level delivery of MEND (Mind, Exercise, Nutrition...Do it!) 5-7, a multicomponent community-based, healthy lifestyle intervention designed for overweight and obese children aged 5-7 years and their families.

**Design** Pre-post study design.

**Setting** Community venues at 37 locations across the UK.

**Participants** 440 overweight or obese children (42% boys; mean age 6.1 years; BMI z-score 2.86) and their parents/carers participated in the intervention.

**Intervention** MEND 5-7 is a 10-week, family-based, child weight-management intervention consisting of weekly group sessions. It includes positive parenting, active play, nutrition education and behaviour change strategies. The intervention is designed to be scalable and delivered by a range of health and social care professionals.

**Primary and secondary outcome measures** The primary outcome was BMI z-score. Secondary outcome measures included BMI, waist circumference, waist circumference z-score, children's psychological symptoms, parenting self-efficacy, physical activity and sedentary behaviours and the proportion of parents and children eating 5 or more portions of fruit and vegetables.

**Results:** 274 (62%) children were measured pre and post-intervention (baseline and 10-weeks). Post-intervention, mean BMI and waist circumference decreased by 0.5 kg/m<sup>2</sup> and 0.9 cm, while z-scores decreased by 0.20 and 0.20, respectively (p<0.0001). Improvements were found in children's psychological symptoms score (-1.6 units, p<0.0001), parent self-efficacy domains (p<0.0001), physical activity (+2.9 hours/week, p<0.01), sedentary activities (-4.1 hours/week, p<0.0001) and the proportion of parents and children eating 5 or more portions of fruit and vegetables per day (both p<0.0001). Attendance of the 10 sessions was 73% with a 70% retention rate.

1  
2  
3 **Conclusions:** These findings suggest that when implemented under service level conditions  
4 the MEND 5-7 programme was acceptable to families with beneficial effects on physical,  
5 behavioural and psychological outcomes when delivered at scale. Further investigation is  
6 warranted to establish if these findings are replicable under controlled conditions.  
7  
8  
9

## 10 11 12 **Article Summary**

### 13 **Article Focus**

- 14 • Childhood obesity prevalence rates remain high in the UK and globally.
- 15 • To our knowledge there are no published, peer-reviewed weight management trials for  
16 children aged 5-7 in England.

### 17 **Key messages**

- 18 • The MEND 5-7 programme was acceptable to families and had beneficial effects on  
19 physical, behavioural and psychological outcomes when delivered at scale.
- 20 • This study demonstrates that a community-based intervention delivered by non-obesity  
21 specialists has the potential to provide a scalable and suitable care pathway for families  
22 of overweight and obese children.

### 23 **Strengths and limitations**

- 24 • A strength of the study is that it utilises 'real-world' data representative of childhood  
25 community based interventions that are scalable to reduce childhood obesity levels. An  
26 additional strength is that MEND 5-7 was delivered by community-based, non-obesity  
27 specialists in contrast to other studies that have used highly skilled professionals to  
28 deliver the intervention
- 29 • A limitation is that only 62% of participants who started the programme completed post  
30 programme measurements. This level of completion is not atypical for a pilot study or  
31 reports of service-level implementation but may be a source of bias that could lead to an  
32 overestimation of treatment effect.  
33  
34  
35  
36  
37  
38  
39  
40  
41  
42  
43  
44  
45  
46  
47  
48  
49  
50  
51  
52  
53  
54  
55  
56  
57  
58  
59  
60

## INTRODUCTION

Childhood obesity is associated with adverse effects on short and long term health [1, 2]. Prevalence rates continue to be high globally and more specifically in the UK [3]. In 2005, the Department of Health initiated the National Child Measurement Programme (NCMP) to identify school children in Reception (typically aged 4-5 years) and Year 6 (aged 10-11 years) who are overweight or obese in England [4]. Since its inception, results from the NCMP have indicated high levels of overweight and obesity in both age groups - the most recent findings (school year 2010/2011) identifying 22.6% and 33.4% of Reception and Year 6 children as overweight or obese, respectively. Surveillance programmes have evolved into screening programmes with a large number of UK primary care trusts choosing to inform parents of their child's weight status. Although this practice is controversial it is also the case that identification may be a trigger for parents to initiate lifestyle change and/or seek professional support [5].

Research has indicated that there may be an effectiveness gradient with regard to the impact of child obesity treatment with age [6]. Generally, earlier treatment is associated with better outcomes following programmes that are less intensive. To be effective, it is recommended that interventions are multicomponent and include age-appropriate nutrition and physical activity with behaviour change strategies that are developmentally appropriate to the cognitive abilities of the child and the nature of relationships in the family life cycle. Although the availability of treatments is steadily increasing, there are significant disparities in the availability of treatments across the developmental continuum. In the UK only 8 out of 45 weight management schemes cover the 5 to 7 age range [7] and only four out of the 13 Department of Health approved Child Weight Management programmes are suitable for children under the age of 7 [8]. To our knowledge there are no published, peer-reviewed weight management trials for children aged 5-7 in England.

1  
2  
3 The aim of this study was to report outcomes from the UK service level delivery of MEND 5-  
4 7 (Mind, Exercise, Nutrition... Do it!), a multicomponent community-based healthy lifestyle  
5 intervention designed for overweight and obese children aged 5-7 years and their families.  
6  
7  
8  
9

## 10 **METHODS**

### 11 **Recruitment**

12  
13 Families were recruited between 2009 and 2011 using a variety of techniques. MEND  
14 provides recruitment resources such as posters, flyers and letters that can be used within  
15 local networks to support the recruitment process. In addition, support is also provided  
16 detailing effective use of these resources. Children were eligible if they were classified as  
17 overweight or obese (BMI  $\geq 91^{\text{st}}$  percentile) according to the UK 1990 reference data [9]; had  
18 no apparent clinical conditions, comorbidities, physical disabilities or learning difficulties that  
19 would interfere with programme engagement and were aged between 5 and 7 years with at  
20 least one parent/carer who was able to attend each of the programme sessions  
21  
22  
23  
24  
25  
26  
27  
28  
29  
30  
31

### 32 **Study Design**

33  
34 The study employed an uncontrolled pre post design evaluating changes in anthropometric,  
35 psychosocial, physical activity and nutritional outcomes. This study reports the effects of the  
36 programme when delivered in UK community settings under service level conditions.  
37  
38  
39  
40  
41  
42

### 43 **Study Intervention**

44  
45 The MEND 5-7 programme is a comprehensive, multi-component intervention designed to  
46 tackle obesity in childhood. The programme supports families by providing information on  
47 child nutrition (based on government healthy eating guidelines), active play and parenting  
48 practices to help parents practically integrate these recommendations into everyday life. The  
49 programme uses a non-diet approach to prevent unduly restrictive eating which can lead to  
50 problematic eating behaviours [10].  
51  
52  
53  
54  
55  
56  
57  
58  
59  
60

1  
2  
3 MEND 5-7 is based around key principles in health-related behaviour change and  
4 behavioural parent training programmes. These methods are drawn from evidence-based  
5 practices in child psychology and parenting interventions [11].  
6  
7  
8  
9

10  
11 Reviews of behavioural treatments for childhood obesity show group-based interventions are  
12 the most commonly used delivery formats and are more effective than individual treatment  
13 sessions [12]. Groups are more efficient, provide greater opportunity for therapeutic  
14 interactions between participants, improve attendance rates and are cost-effective.  
15 Community groups provide greater access to minority ethnic groups, counter stigma, provide  
16 a social support network and aid the therapeutic process of problem-solving. These factors  
17 improve understanding of the condition, adherence to the intervention and implementation of  
18 changes in behaviour. Recognising the importance of family involvement for behaviour  
19 change, the programme requires a parent or carer to attend all sessions.  
20  
21  
22  
23  
24  
25  
26  
27  
28  
29

### 30 31 **Structure and Content**

32  
33 The programme consists of 10 (one hour and forty-five minute duration) weekly group-based  
34 sessions delivered by two trained leaders and one optional assistant. The programme is held  
35 in community settings such as sports centres and schools for groups of 8-15 children and  
36 their parents/carers. The first and last sessions are allocated as introductory and graduation  
37 sessions, respectively, incorporating measurements and parental/carers questionnaire  
38 completion.  
39  
40  
41  
42  
43  
44  
45  
46  
47

48 Each session has four components; 'Power Time' (20 minutes), 'Healthy Families' (25  
49 minutes), 'Active Play' and 'Parent/carers Workshop' (during this time children take part in 60  
50 minutes of physical activity and parents/carers attend a workshop). 'Power Time' is a joint  
51 parent/carers and child snack time designed to help parents incorporate evidence-based food  
52 exposure techniques into their daily routines to increase their child's preferences for  
53 healthier foods. 'Healthy Families' is also a joint parent/carers and child session that focuses  
54  
55  
56  
57  
58  
59  
60

1  
2  
3 on educating and promoting skills for everyday play, active family lifestyles and healthy  
4 family eating in the home environment. 'Active Play' is a child-only play session that takes  
5 place while the parents/carers are in their workshop. The focus is on fun and active  
6 participation. The aim is to provide children with positive experiences of being active in a  
7 supportive setting.  
8  
9  
10  
11  
12

13  
14  
15 The parent/carer workshops include interactive activities and discussions focusing on  
16 nutrition, activity and behaviour change. Five of the parent/carer workshops focus on healthy  
17 eating and nutrition-related topics. Group discussions include practical training on  
18 understanding food and drink labels, fat and sugar content of foods and drinks, portion sizes,  
19 and managing fussy eating. The remaining workshops focus on family rules and routines,  
20 reducing screen time and overcoming barriers to physical activity.  
21  
22  
23  
24  
25  
26  
27  
28

### 29 **Training**

30  
31 The MEND 5-7 programme is delivered by community-based health, education and physical  
32 activity professionals who attend a 2-day, face-to-face training course. The training is  
33 derived from established competency-based skills training methods [13] and includes direct  
34 teaching, role-play, guided discussion and multiple choice assessments. After training, all  
35 staff are required to complete an on-line assessment to gain certification to deliver the  
36 programme and pass an enhanced CRB (Criminal Records Bureau) check.  
37  
38  
39

40  
41 Following successful completion of the training, delivery teams are provided with four  
42 manuals, two for programme delivery, one for programme management and one for physical  
43 activity. These resources provide full details of session plans, objectives, direct teaching  
44 notes, desired outcomes, set-up and delivery requirements and all aspects of the physical  
45 activity programme component.  
46  
47  
48  
49  
50  
51  
52

### 53 **Outcome Measurements**

54  
55  
56  
57 **Demographics**  
58  
59  
60



1  
2  
3 Socioeconomic status was determined based on home ownership [14], grouped as: 'owner  
4 occupied', 'private rented', 'social rented' and 'other'. Ethnic background was based on the  
5 UK census categorisation as outlined in the National Obesity Observatory Standard  
6 Evaluation Framework for weight management interventions [14].  
7  
8  
9

### 10 11 12 13 Physical activity and inactivity

14 Physical activity level and sedentary behaviours were assessed using items adapted from  
15 the 'outdoor playtime checklist' [15]. Physical activity was assessed by asking 'How much  
16 time did your child spend playing outside in the yard or street of your house (or the house of  
17 a friend, neighbour or relative), or at the park, playground, or outdoor recreation (e.g.  
18 swimming pool, zoo or amusement park), including while at day care or preschool?'  
19 Television viewing time and time spent playing computer/console game were assessed by  
20 asking 'How much time would you say your child spends watching television (including  
21 videos and DVD's), including time spent watching TV in other people's houses?' and 'How  
22 much time did your child spend playing Play-Station/X-box/Nintendo/Computer games  
23 (including watching a friend/brother/sister/adult play, and at other people's houses)?' Total  
24 sedentary activity was calculated from the addition of TV viewing time and time spent playing  
25 computer/console games. Answers were given in hours and minutes per day, based on  
26 typical days in the last month. Separate estimates were provided for weekday and weekend  
27 days.  
28  
29  
30  
31  
32  
33  
34  
35  
36  
37  
38  
39  
40  
41  
42  
43  
44

### 45 46 Anthropometry

47 Body weight (kg) and height (cm) were measured using standardised procedures [16] and  
48 body mass index calculated as  $\text{body weight(kg)/height(m}^2\text{)}$ . Waist circumference (cm) was  
49 measured 4 cm above the umbilicus [17]. BMI and waist circumference z-scores were  
50 calculated from UK national reference data [9, 18] using LMS growth software [19].  
51  
52  
53  
54  
55  
56  
57

### 58 59 Fruit and vegetable consumption 60

1  
2  
3 Child and parent fruit and vegetable consumption were assessed by the daily frequency of  
4 portions consumed [20]. Questions were measured on a 7 point likert scale (less than one  
5 per week, one per week, two to three per week, four to six per week, one per day, two per  
6 day, or three or more per day) [20].  
7  
8  
9

#### 10 11 12 Parenting self-efficacy

13  
14 Parenting self efficacy was measured using the subscales of 'Play and Enjoyment',  
15 'Discipline and Boundary Setting' and 'Learning and Knowledge' taken from 'TOPSE' (Tool  
16 to Measure Parenting Self Efficacy) [21].  
17  
18  
19

#### 20 21 22 Strengths and Difficulties Questionnaire (SDQ)

23  
24 The SDQ – Parent's Version [13] provides a measure of emotional distress in children and  
25 adolescents. The measure consists of 25 statements referring to behaviours associated with  
26 emotional difficulties, such as 'often has temper tantrums or hot tempers' and 'often lies or  
27 cheats'. Parents are asked to indicate how 'true' each statement is of their child on a 3 point  
28 likert scale (not true, somewhat true, certainly true). A 'total difficulties' score is generated,  
29 with higher scores indicating greater levels of emotional distress.  
30  
31  
32  
33  
34  
35  
36  
37  
38  
39

#### 40 41 42 **Data Cleaning and statistical analysis**

43  
44 Due to the data being collected under service level conditions by non-researchers, strict  
45 cleaning procedures were undertaken to ensure data quality. Outliers for anthropometric  
46 measurements were identified from visual analysis of histograms and scatterplots, resulting  
47 in 7 data sets being excluded. Participants were excluded from the activity analysis if the  
48 addition of reported daily physical activity and sedentary behaviour exceeded 16 hours,  
49 resulting in seven data sets being excluded.  
50  
51  
52  
53  
54

55  
56 Variable distribution was checked using the Kruskal-Wallis test for normality. Paired sample  
57 t-tests were employed to assess mean differences in the outcome variables from baseline to  
58  
59  
60

1  
2  
3 3 months (end of intervention). Changes in the proportions for fruit and vegetable intake from  
4 baseline to the end of the intervention were assessed using the McNemar's test. Baseline  
5 differences for those who did and did not complete post programme measurements were  
6 examined using independent sample t-tests. Similarly, effects of gender pre-post programme  
7 were examined using independent sample t-tests. Statistical significance was set at  $P <$   
8 0.05. All analyses were conducted using SPSS 18.0 for Windows (SPSS, Chicago, IL).  
9  
10  
11  
12  
13  
14

## 15 16 17 **RESULTS**

### 18 **Recruitment**

19 Four hundred and forty children participated in MEND 5-7 programmes across 37 UK  
20 locations.  
21  
22  
23  
24

### 25 **Baseline demographic and anthropometric characteristics**

26 Fifty-eight percent were female, and 79% of participants were obese ( $BMI \geq 98^{\text{th}}$  centile).  
27 Thirty three percent of children were from non-white ethnic backgrounds with 57% reporting  
28 they did not own their home (Table 1).  
29  
30  
31  
32  
33  
34

### 35 **Completers vs. non completers**

36 There were no significant differences in baseline demographic and anthropometric  
37 characteristics between children with and without post programme measurements.  
38 Significant differences were evident in baseline comparisons of physical activity levels ( $15.0$   
39  $\pm 8.9$  hours/week completers vs.  $19.3 \pm 13.7$  hours/week non completers,  $P < 0.01$ ). All other  
40 outcome measures were not significantly different at baseline.  
41  
42  
43  
44  
45  
46  
47  
48  
49  
50

### 51 **Attendance and retention**

52 Attendance data was available for 81% of participants. Mean attendance for the programme  
53 was 73% and retention rate (based on children attending at least 7 sessions) was 70%.  
54  
55  
56  
57  
58  
59  
60

### Outcome measures

Within subject differences in anthropometric, psychosocial and activity measures pre and post intervention are shown in Table 2. Significant reductions in BMI, BMI z-score, waist circumference, waist z-score and child total difficulties score (all  $P < 0.0001$ ) post intervention were noted. Positive changes were also observed for TV time, sedentary activity ( $P < 0.0001$ ) and physical activity ( $P < 0.01$ ). Significant increases were observed in all parenting self-efficacy domains and the proportion of children and parents eating at least five fruit and vegetables per day (all  $P < 0.0001$ ). There were no gender differences in any of the study outcomes.

### DISCUSSION

This study examined outcomes following participation in the MEND programme for children aged 5-7 years old. The intervention demonstrated positive effects on children's weight status, diet and activity levels. Parents with pre-post data reported they were more confident and improvements in their perceptions of children's emotional well-being were found.

Children with pre-post data achieved a significant reduction in BMI z-score of -0.20 after ten weeks. Comparison between published interventions is problematic because zBMI scales attenuate absolute BMI change [22]. Equivalent changes in absolute BMI do not equate to equivalent changes in zBMI, such that children with higher baseline zBMI require greater changes in absolute BMI to produce equivalent changes in zBMI. Notwithstanding this limitation, consideration of zBMI changes in interventions with children of a comparable age-group provides an indication of the relative efficacy of an intervention. Outcomes reported in studies of GP-led behavioural treatment of individual families (LEAP intervention [23]) and in generic parenting programmes unmodified to deal with the specific needs of obese and overweight children (Triple P) have shown no significant reductions in measures of degree of obesity. A version of the Triple P programme specifically adapted for obesity (Lifestyle Triple P) showed a reduction of -0.11 at 20 weeks [24], the HICKUPS study of a multicomponent group-based parenting intervention reported a reduction of -0.36 at 6 months and the

1  
2  
3 PEACH study of a parent-only group intervention showed a reduction of -0.26 at 6 months  
4 [25, 26]. Interestingly, the results were similar to the unpublished three months data (-0.20)  
5  
6 for children taking part in the randomised controlled trial of the MEND programme for 7 to 13  
7  
8 year old children [27] and it's national service level evaluation (-0.18) [28].  
9

10  
11  
12  
13 Generally, interventions that produce greater treatment effects are usually more intense and  
14 involve relatively higher levels of contact time [29]. The US preventive services task force  
15 (USPSTF) conclude that low intensity interventions – defined as those involving less than 25  
16 hours direct professional contact time – are insufficient to have a positive impact on weight-  
17 status in obese and overweight children. Interestingly, the MEND 5-7 programme consists of  
18 17.5 hours of face-to-face contact time and therefore falls into the category of a low intensity  
19 intervention. Despite this, participation in the programme was associated with significant  
20 reductions in zBMI (-0.20) comparable to interventions with much greater contact time.  
21

22  
23 MEND 5-7 was delivered by community-based, non-obesity specialists in contrast to other  
24 studies that have used highly skilled professionals to deliver the intervention [25, 26]. It has  
25 been recognised that a large proportion of childhood obesity interventions employ intensive  
26 programmes involving specialist dieticians and other health professionals [30]. Childhood  
27 obesity interventions are significantly more expensive when skilled professionals and  
28 additional contact hours are employed, and in an increasingly resource-constrained  
29 environment, these factors might limit the reach of evidence-based programmes [30]. The  
30 development of a clinically effective, low-intensity programme using non-specialist,  
31 community-based delivery staff could be a crucial strategy to meet the needs of younger  
32 children who are already overweight. The present results suggest that such a model is  
33 feasible and effective when implemented under service level conditions and suggest that  
34 MEND 5-7 may be a good candidate for large-scale implementation.  
35  
36  
37  
38  
39  
40  
41  
42  
43  
44  
45  
46  
47  
48  
49  
50  
51  
52

53  
54  
55  
56 The UK Department of Health physical activity guidelines specify that children and young  
57 people (5-18 years old) should engage in 60 minutes of activity per day whilst minimising  
58  
59  
60

1  
2  
3 sedentary behaviours [31]. Sedentary behaviours - in particular, time spent watching  
4 television - are associated with metabolic risk factors in children [32] and have been shown  
5 to predict BMI in early adulthood [33]. Independent of TV viewing time, higher levels of  
6 sedentary behaviours have been shown to lower levels of physical activity in children [34].  
7  
8

9  
10  
11 There is also evidence that participation in physical activity leads to health benefits [35] and  
12 lowers levels of overweight and obesity in children [36]. In this study, MEND 5-7 produced  
13 significant, positive changes in physical activity levels ( $P < 0.01$ ), TV viewing time and  
14 sedentary activity levels ( $P < 0.0001$ ). Parents reported children on the programme had  
15 reduced sedentary behaviour by an average of 4.1 hours, of which 3.4 hours was television  
16 viewing, and increased their physical activity levels by 2.9 hours per week. The concurrent  
17 reduction in sedentary activity and increase in physical activity following participation in the  
18 programme is thus very encouraging.  
19  
20  
21  
22  
23  
24  
25  
26  
27

28  
29 Some limitations of the study should be acknowledged. Only 62% of participants who started  
30 the programme completed post programme measurements. This level of completion is not  
31 atypical for a pilot study or reports of service-level implementation [37, 38] but may be a  
32 source of bias that could lead to an overestimation of treatment effect. Statistical analyses  
33 revealed that there were limited differences between those participants that completed the  
34 programme and those who did not. The data presented here are uncontrolled data  
35 representing the short-term impact of the intervention. Controlled studies of the impact  
36 beyond the ten week programme are needed to establish whether the present results are  
37 sustained and more effective than no or an alternative intervention. Whilst it is well  
38 documented that subjective measures of physical activity over-report when compared to  
39 more accurate objectively measured physical activity [39], subjective measurement can be a  
40 useful and cost effective tool when employed in a community-based programme if it is not  
41 feasible to obtain objective measurements [40]. The improvements found in physical activity  
42 and sedentary behaviours require supporting evidence using objective measurement.  
43  
44  
45  
46  
47  
48  
49  
50  
51  
52  
53  
54  
55  
56  
57  
58  
59  
60

## CONCLUSION

The MEND 5-7 programme appears to have had beneficial effects on physical, behavioural and psychological outcomes for children with pre-post data when implemented in UK community settings under service level conditions. High attendance and retention rates suggest the programme was acceptable to families. Coupled with a scalable delivery model using non-obesity specialists, these preliminary findings warrant further evaluation in a formal trial to establish if outcomes are replicable and sustained, potentially providing a scalable and suitable care pathway for families of overweight and obese children on a national level.

## Acknowledgements

We would like to thank Dr Venediktos Kapetanakis for his statistical advice. We would also like to thank all the families who took part in the MEND 5-7 programme.

## Funding

This research received no specific grant from any funding agency.

## Data Sharing Statement

no additional data available.

## Ethical Approval

This study is a service evaluation and not within the remit of UK Ethics Committee governance. Parents consented to take part in the study and for use of their anonymised data.

## Contributors

L Smith performed statistical analysis and contributed to writing the paper. P Chadwick co-developed the intervention and contributed to writing the paper, interpretation and analysis of

1  
2  
3 results. D Radley contributed to writing the paper and statistical analysis. M Kolotourou  
4 critically reviewed all parts of the paper and assisted in the interpretation and analysis of the  
5 results. C Gammon contributed to the interpretation of the results and critically reviewed all  
6 parts of the paper. J Rosborough co-developed the intervention and critically reviewed all  
7 parts of the paper. P Sacher co-developed the intervention, contributed to the interpretation  
8 of the results and writing the paper and critically reviewed all parts of the paper. All authors  
9 approved the final draft of the paper.  
10  
11  
12  
13  
14  
15  
16

### 17 **Competing interests**

18  
19  
20 Dr. Lindsey Smith, Dr. Duncan Radley, Catherine Gammon and Jennifer Rosborough are  
21 employed full-time at MEND. Dr. Paul Chadwick is currently employed part-time as Clinical  
22 Director at MEND. Maria Kolotourou is employed part-time at MEND. Paul Sacher is  
23 currently employed as a Senior Research Fellow at the UCL Institute of Child Health as well  
24 as Chief Research and Development Officer at MEND. Dr Venediktos Kapetanakis serves  
25 as a consultant statistician to MEND.  
26  
27  
28  
29  
30  
31  
32  
33  
34  
35  
36  
37  
38  
39  
40  
41  
42  
43  
44  
45  
46  
47  
48  
49  
50  
51  
52  
53  
54  
55  
56  
57  
58  
59  
60



## REFERENCES

1. Abrams P, Levitt Katz LE. Metabolic effects of obesity causing disease in childhood. *Curr Opin Endocrinol Diabetes Obes* 2011; 18: 23-7.
2. Reilly JJ, Methven E, McDowell ZC et al. Health consequences of obesity. *Arch Dis Child* 2003; 88: 748-52.
3. Olds T, Maher C, Zumin S et al. Evidence that the prevalence of childhood overweight is plateauing: data from nine countries. *Int J Pediatr Obes* 2011; 6: 342-60.
4. NHS, National Child Measurement Programme, 2011, Crown copyright.
5. Chomitz VR, McGowan RJ, Wendel JM et al. Healthy Living Cambridge Kids: a community-based participatory effort to promote healthy weight and fitness. *Obesity (Silver Spring)* 2010; 18 Suppl 1: S45-53.
6. Waters E, de Silva-Sanigorski A, Hall BJ et al. Interventions for preventing obesity in children. *Cochrane Database Syst Rev* 2011; 12: CD001871.
7. Aicken C, Arai Lroberts H. Schemes to promote healthy weight among obese and overweight children in England. EPPI-Centre report, Social Science Research Unit 2008; 1-37.
8. Cross-Government Obesity Unit. Healthy Weight, Healthy Lives: Child weight management programme and training providers framework. 2009;
9. Cole TJ, Freeman JV, Preece MA. Body mass index reference curves for the UK, 1990. *Arch Dis Child* 1995; 73: 25-9.
10. NICE. National Institute for Health and Clinical Excellence (NICE) guidance. Obesity: the prevention, identification, assessment and management of overweight and obesity in adults and children. 2006;
11. NICE. Parent-training/education programmes in the management of children with conduct disorders. Technology appraisals guidance 102. 2006;
12. Robinson TN. Behavioural treatment of childhood and adolescent obesity. *Int J Obes Relat Metab Disord* 1999; 23 Suppl 2: S52-7.
13. Leung WC. Competency based medical training: review. *BMJ* 2002; 325: 693-6.
14. National Obesity Observatory. Standard evaluation framework. 2009;
15. Burdette HL Whitaker RC. Neighborhood playgrounds, fast food restaurants, and crime: relationships to overweight in low-income preschool children. *Prev Med* 2004; 38: 57-63.
16. Lohman T, Roche AF, Martorell R, Anthropometric standardization reference manual., 1988, Human Kinetics Books, Champaign, IL
17. Rudolf MC, Walker J, Cole TJ. What is the best way to measure waist circumference? *Int J Pediatr Obes* 2007; 2: 58-61.
18. McCarthy HD, Jarrett KV, Crawley HF. The development of waist circumference percentiles in British children aged 5.0-16.9 y. *Eur J Clin Nutr* 2001; 55: 902-7.
19. Pan H CT. LMSgrowth: a Microsoft Excel add-in to access growth references based on the LMS method. Version 2.74.
20. Sweetman C, McGowan L, Croker H et al. Characteristics of family mealtimes affecting children's vegetable consumption and liking. *J Am Diet Assoc* 2011; 111: 269-73.
21. Kendall S, Bloomfield L. Developing and validating a tool to measure parenting self-efficacy. *J Adv Nurs* 2005; 51: 174-81.
22. Cole TJ, Faith MS, Pietrobelli A et al. What is the best measure of adiposity change in growing children: BMI, BMI %, BMI z-score or BMI centile? *Eur J Clin Nutr* 2005; 59: 419-25.
23. McCallum Z, Wake M, Gerner B et al. Outcome data from the LEAP (Live, Eat and Play) trial: a randomized controlled trial of a primary care intervention for childhood overweight/mild obesity. *Int J Obes (Lond)* 2007; 31: 630-6.
24. West F, Sanders MR, Cleghorn GJ et al. Randomised clinical trial of a family-based lifestyle intervention for childhood obesity involving parents as the exclusive agents of change. *Behav Res Ther* 2010; 48: 1170-9.

- 1
  - 2
  - 3
  - 4
  - 5
  - 6
  - 7
  - 8
  - 9
  - 10
  - 11
  - 12
  - 13
  - 14
  - 15
  - 16
  - 17
  - 18
  - 19
  - 20
  - 21
  - 22
  - 23
  - 24
  - 25
  - 26
  - 27
  - 28
  - 29
  - 30
  - 31
  - 32
  - 33
  - 34
  - 35
  - 36
  - 37
  - 38
  - 39
  - 40
  - 41
  - 42
  - 43
  - 44
  - 45
  - 46
  - 47
  - 48
  - 49
  - 50
  - 51
  - 52
  - 53
  - 54
  - 55
  - 56
  - 57
  - 58
  - 59
  - 60
25. Okely AD, Collins CE, Morgan PJ et al. Multi-site randomized controlled trial of a child-centered physical activity program, a parent-centered dietary-modification program, or both in overweight children: the HIKCUPS study. *J Pediatr* 2010; 157: 388-94, 394 e1.
26. Magarey AM, Perry RA, Baur LA et al. A parent-led family-focused treatment program for overweight children aged 5 to 9 years: the PEACH RCT. *Pediatrics* 2011; 127: 214-22.
27. Sacher PM, Kolotourou M, Chadwick PM et al. Randomized controlled trial of the MEND program: a family-based community intervention for childhood obesity. *Obesity (Silver Spring)* 2010; 18 Suppl 1: S62-8.
28. Sacher P, Chadwick P, Kolotourou K et al. Evaluating the effectiveness of the scale-up and spread of the MEND 7-13 childhood obesity program: UK national data (2007-2010). *Obesity (Silver Spring)* 2011; 19: S52.
29. Whitlock EP, O'Connor EA, Williams SB et al. Effectiveness of weight management interventions in children: a targeted systematic review for the USPSTF. *Pediatrics* 2010; 125: e396-418.
30. Taveras EM, Gortmaker SL, Hohman KH et al. Randomized controlled trial to improve primary care to prevent and manage childhood obesity: the High Five for Kids study. *Arch Pediatr Adolesc Med* 2011; 165: 714-22.
31. DoH. Start Active, Stay Active - A report on physical activity for health from the four home countries' Chief Medical Officers. Crown Copyright 2011;
32. Ekelund U, Brage S, Froberg K et al. TV viewing and physical activity are independently associated with metabolic risk in children: the European Youth Heart Study. *PLoS Med* 2006; 3: e488.
33. Hancox RJ, Milne BJ, Poulton R. Association between child and adolescent television viewing and adult health: a longitudinal birth cohort study. *Lancet* 2004; 364: 257-62.
34. Jago R, Baranowski T, Thompson D et al. Sedentary behavior, not TV viewing, predicts physical activity among sedentary 3-to 7-year-old children. *Pediatric Exercise Science* 2005; 17: 364-376.
35. Janssen I, Leblanc AG. Systematic review of the health benefits of physical activity and fitness in school-aged children and youth. *Int J Behav Nutr Phys Act* 2010; 7: 40.
36. Hills AP, Andersen LBB, Byrne NM. Physical activity and obesity in children. *Br J Sports Med* 2011; 45: 866-70.
37. Robertson W, Friede T, Blissett J et al. Pilot of "Families for Health": community-based family intervention for obesity. *Arch Dis Child* 2008; 93: 921-6.
38. Watson PM, Dugdill L, Pickering K et al. A whole family approach to childhood obesity management (GOALS): relationship between adult and child BMI change. *Ann Hum Biol* 2011; 38: 445-52.
39. Adamo KB, Prince SA, Tricco AC et al. A comparison of indirect versus direct measures for assessing physical activity in the pediatric population: a systematic review. *Int J Pediatr Obes* 2009; 4: 2-27.
40. van Sluijs EM, McMinn AM, Griffin SJ. Effectiveness of interventions to promote physical activity in children and adolescents: systematic review of controlled trials. *Br J Sports Med* 2008; 42: 653-7.

**Table 1.** Baseline demographic and anthropometric characteristics

|                             | % (n <sup>1</sup> ) or mean (SD) |
|-----------------------------|----------------------------------|
| Gender                      |                                  |
| Males                       | 42.0 % (185)                     |
| Females                     | 58.0 % (255)                     |
| Ethnicity                   |                                  |
| White – British             | 67.2 % (275)                     |
| Black                       | 6.6 % (27)                       |
| Asian                       | 19.6 % (80)                      |
| Mixed                       | 5.1 % (21)                       |
| Other                       | 1.5 % (6)                        |
| House ownership             |                                  |
| Owner occupied              | 43.2 % (162)                     |
| Private rented              | 25.9 % (97)                      |
| Social rented               | 30.1 % (113)                     |
| Other                       | 0.8 % (3)                        |
| Age (years)                 | 6.1 (0.8)                        |
| Weight (kg)                 | 33.0 (7.9)                       |
| Height (cm)                 | 120.7 (7.7)                      |
| BMI (kg/m <sup>2</sup> )    | 22.5 (3.6)                       |
| BMI z-score                 | 2.86 (0.91)                      |
| Waist circumference (cm)    | 70.4 (9.5)                       |
| Waist circumference z-score | 3.13 (1.09)                      |

<sup>1</sup> n = 440, baseline n may vary due to missing data and data cleaning procedures.

**Table 2.** Within subject changes at pre and post intervention

|                                              | n <sup>1</sup> | Pre         | Post        | Difference             |         |
|----------------------------------------------|----------------|-------------|-------------|------------------------|---------|
|                                              |                | Mean (SD)   | Mean (SD)   | Mean (CI)              | P       |
| <b>Anthropometry</b>                         |                |             |             |                        |         |
| BMI (kg/m <sup>2</sup> )                     | 274            | 22.5 (3.6)  | 22.1 (3.7)  | -0.5 (-0.6 to -0.4)    | <0.0001 |
| BMI z-score                                  | 274            | 2.86 (0.90) | 2.66 (0.94) | -0.20 (-0.23 to -0.17) | <0.0001 |
| Waist circumference (cm)                     | 267            | 70.9 (9.9)  | 69.9 (10.0) | -0.9 (-1.3 to -0.5)    | <0.0001 |
| Waist circumference z-score                  | 267            | 3.16 (1.10) | 2.96 (1.14) | -0.20 (-0.25 to -0.15) | <0.0001 |
| <b>Psychosocial indices</b>                  |                |             |             |                        |         |
| Child total difficulties score (range 0-40)  | 212            | 10.8 (5.7)  | 9.2 (5.8)   | -1.6 (-2.2 to -0.9)    | <0.0001 |
| Play and enjoyment score (range 0-60)        | 240            | 48.6 (10.4) | 51.6 (9.1)  | 3.1 (1.9 to 4.2)       | <0.0001 |
| Discipline and boundaries score (range 0-60) | 235            | 42.0 (11.9) | 47.3 (9.7)  | 5.3 (4.0 to 6.6)       | <0.0001 |
| Learning and knowledge score (range 0-60)    | 238            | 48.7 (9.2)  | 51.1 (8.3)  | 2.5 (1.3 to 3.7)       | <0.0001 |
| <b>Activity indices</b>                      |                |             |             |                        |         |
| Sedentary activity (hours/week)              | 168            | 21.6 (12.8) | 17.5 (10.8) | -4.1 (-6.1 to -2.2)    | <0.0001 |
| Physical activity (hours/week)               | 168            | 15.1 (8.8)  | 18.0 (9.4)  | 2.9 (1.2 to 4.7)       | <0.01   |
| TV time (hours/week)                         | 168            | 16.6 (10.9) | 13.2 (9.0)  | -3.4 (-5.0 to -1.8)    | <0.0001 |

<sup>1</sup> numbers vary due to missing data and data cleaning procedures



**Assessing the short-term outcomes of a community-based intervention for overweight and obese children: The MEND 5-7 programme.**

|                                 |                                                                                                                                                                                                                                                                                                                                                                                                                                                                                                                                                                                                                |
|---------------------------------|----------------------------------------------------------------------------------------------------------------------------------------------------------------------------------------------------------------------------------------------------------------------------------------------------------------------------------------------------------------------------------------------------------------------------------------------------------------------------------------------------------------------------------------------------------------------------------------------------------------|
| Journal:                        | <i>BMJ Open</i>                                                                                                                                                                                                                                                                                                                                                                                                                                                                                                                                                                                                |
| Manuscript ID:                  | bmjopen-2013-002607.R1                                                                                                                                                                                                                                                                                                                                                                                                                                                                                                                                                                                         |
| Article Type:                   | Research                                                                                                                                                                                                                                                                                                                                                                                                                                                                                                                                                                                                       |
| Date Submitted by the Author:   | 08-Mar-2013                                                                                                                                                                                                                                                                                                                                                                                                                                                                                                                                                                                                    |
| Complete List of Authors:       | Smith, Lindsey; University College London, Institute of Child Health, Childhood Nutrition Research Centre; MEND Central Ltd, Chadwick, Paul; Cancer Research, University College London, UK Health Behaviour Unit; MEND Central Ltd, Radley, Duncan; University College London, Institute of Child Health, Childhood Nutrition Research Centre; MEND Central Ltd, Kolotourou, Maria; MEND Central Ltd, Gammon, Catherine; MEND Central Ltd, Rosborough, Jennifer; MEND Central Ltd, Sacher, Paul; University College London, Institute of Child Health, Childhood Nutrition Research Centre; MEND Central Ltd, |
| <b>Primary Subject Heading</b>: | Public health                                                                                                                                                                                                                                                                                                                                                                                                                                                                                                                                                                                                  |
| Secondary Subject Heading:      | Paediatrics, Nutrition and metabolism                                                                                                                                                                                                                                                                                                                                                                                                                                                                                                                                                                          |
| Keywords:                       | Community child health < PAEDIATRICS, PUBLIC HEALTH, PAEDIATRICS                                                                                                                                                                                                                                                                                                                                                                                                                                                                                                                                               |
|                                 |                                                                                                                                                                                                                                                                                                                                                                                                                                                                                                                                                                                                                |

SCHOLARONE™  
Manuscripts

1  
2  
3 **Assessing the short-term outcomes of a community-based intervention for**  
4 **overweight and obese children: The MEND 5-7 programme.**  
5

6  
7 Smith LR<sup>1,2</sup>, Chadwick P<sup>2,3</sup>, Radley D<sup>1,2</sup>, Kolotourou M<sup>2</sup>, Gammon CS<sup>2</sup>, Rosborough J<sup>2</sup>,  
8 Sacher PM<sup>1,2</sup>,  
9

10 *<sup>1</sup>Childhood Nutrition Research Centre, Institute of Child Health, University College London,*  
11 *United Kingdom. <sup>2</sup>MEND Central, United Kingdom. <sup>3</sup>Cancer Research, UK Health Behaviour*  
12 *Unit, University College London, United Kingdom.*  
13

14  
15  
16  
17 **Corresponding author:** PM Sacher, MEND Central Ltd, Unit 21 Tower Workshops, 58 Riley  
18 Road, London, SE1 3DG. Telephone: 020 7231 7225, Fax: 020 7394 7616, Email:  
19 paul.sacher@mendcentral.org.  
20  
21  
22  
23  
24  
25  
26

27 Keywords: childhood, obesity, intervention, community programme

28 Word count: 3,112  
29  
30  
31  
32  
33  
34  
35  
36  
37  
38  
39  
40  
41  
42  
43  
44  
45  
46  
47  
48  
49  
50  
51  
52  
53  
54  
55  
56  
57  
58  
59  
60

## ABSTRACT

**Objective** The aim of this study was to report outcomes of the UK service level delivery of MEND (Mind, Exercise, Nutrition...Do it!) 5-7, a multicomponent community-based, healthy lifestyle intervention designed for overweight and obese children aged 5-7 years and their families.

**Design** Repeated measures

**Setting** Community venues at 37 locations across the UK.

**Participants** 440 overweight or obese children (42% boys; mean age 6.1 years; BMI z-score 2.86) and their parents/carers participated in the intervention.

**Intervention** MEND 5-7 is a 10-week, family-based, child weight-management intervention consisting of weekly group sessions. It includes positive parenting, active play, nutrition education and behaviour change strategies. The intervention is designed to be scalable and delivered by a range of health and social care professionals.

**Primary and secondary outcome measures** The primary outcome was BMI z-score. Secondary outcome measures included BMI, waist circumference, waist circumference z-score, children's psychological symptoms, parenting self-efficacy, physical activity and sedentary behaviours and the proportion of parents and children eating 5 or more portions of fruit and vegetables.

**Results:** 274 (62%) children were measured pre and post-intervention (baseline; 10-weeks). Post-intervention, mean BMI and waist circumference decreased by 0.5 kg/m<sup>2</sup> and 0.9 cm, while z-scores decreased by 0.20 and 0.20, respectively (p<0.0001). Improvements were found in children's psychological symptoms (-1.6 units, p<0.0001), parent self-efficacy (p<0.0001), physical activity (+2.9 hours/week, p<0.01), sedentary activities (-4.1 hours/week, p<0.0001) and the proportion of parents and children eating 5 or more portions of fruit and vegetables per day (both p<0.0001). Attendance to the 10 sessions was 73% with a 70% retention rate.

**Conclusions:** Participation in the MEND 5-7 programme was associated with beneficial changes in physical, behavioural and psychological outcomes for children with complete sets

1  
2  
3 of measurement data, when implemented in UK community settings under service level  
4 conditions. Further investigation is warranted to establish if these findings are replicable  
5 under controlled conditions.  
6  
7  
8  
9  
10

## 11 12 **Article Summary**

### 13 **Article Focus**

- 14 • Childhood obesity prevalence rates remain high in the UK and globally.
- 15 • To our knowledge there are no published, peer-reviewed weight management trials or  
16 service level evaluations for children aged 5-7 in England.

### 17 **Key messages**

- 18 • The MEND 5-7 programme has high attendance and retention rates and produced  
19 positive changes in physical, behavioural and psychological outcomes.
- 20 • This study demonstrates that a community-based intervention delivered by non-obesity  
21 specialists has a potentially valuable contribution to make as part of a comprehensive  
22 care pathway for families of overweight and obese children.

### 23 **Strengths and limitations**

#### 24 **Strengths**

- 25 • By using service-level data this study contributes to the literature on appropriate targets  
26 for community level interventions.
- 27 • Most of the outcome literature on community-based child weight management  
28 programmes have been delivered by highly-skilled professionals under trial conditions.  
29 This limits the conclusions that can be drawn about whether such outcomes can be  
30 translated to community settings under different conditions of service delivery. The  
31 results of this paper suggest that outcomes similar to those achieved by controlled trials  
32 can be achieved under conditions of normal service delivery.

#### 33 **Limitations**



- 1  
2  
3 • Only 62% of participants who started the programme completed post programme  
4 measurements. Although this level of completion is not atypical for reports of service-  
5 level implementation it is still possible that biases due to selective attrition could lead to  
6 an overestimation of treatment effect.  
7  
8  
9  
10

## 11 INTRODUCTION

12 Childhood obesity is associated with adverse effects on short and long term health [1, 2].  
13 Prevalence rates continue to be high globally and more specifically in the UK [3]. In 2005,  
14 the Department of Health initiated the National Child Measurement Programme (NCMP) to  
15 identify school children in Reception (typically aged 4-5 years) and Year 6 (aged 10-11  
16 years) who are overweight or obese in England [4]. Since its inception, results from the  
17 NCMP have indicated high levels of overweight and obesity in both age groups - the most  
18 recent findings (school year 2010/2011) identifying 22.6% and 33.4% of Reception and Year  
19 6 children as overweight or obese, respectively. Surveillance programmes have evolved into  
20 screening programmes with a high proportion of UK primary care trusts choosing to inform  
21 parents of their child's weight status. Although this practice is controversial it is also the case  
22 that identification may be a trigger for parents to initiate lifestyle change and/or seek  
23 professional support [5].  
24  
25  
26  
27  
28  
29  
30  
31  
32  
33  
34  
35  
36  
37  
38  
39  
40  
41  
42

43 Research has indicated that there may be an effectiveness gradient with regard to the  
44 impact of child obesity treatment with age [6]. Generally, earlier treatment is associated with  
45 better outcomes following programmes that are less intensive. To be effective, it is  
46 recommended that interventions are multicomponent and include age-appropriate nutrition  
47 and physical activity with behaviour change strategies that are developmentally appropriate  
48 to the cognitive abilities of the child and the nature of relationships in the family life cycle [7,  
49 8]. Although the availability of treatments is steadily increasing, there are significant  
50 disparities in the availability of treatments across the developmental continuum. In the UK  
51  
52  
53  
54  
55  
56  
57  
58  
59  
60

1  
2  
3 only 8 out of 45 weight management schemes cover the 5 to 7 age range [9] and only four  
4 out of the 13 Department of Health approved Child Weight Management programmes are  
5 suitable for children under the age of 7 [10]. To our knowledge there are no published, peer-  
6 reviewed weight management trials or service level evaluations for children aged 5-7 in  
7 England. This leaves a gap in the understanding of the outcomes that is possible to achieve  
8 for overweight and obese children in this age range in a UK setting.  
9  
10

11  
12  
13  
14  
15  
16  
17 The aim of this study was to report outcomes from the UK service level delivery of MEND 5-  
18 7 (Mind, Exercise, Nutrition... Do it!), a multicomponent community-based healthy lifestyle  
19 intervention designed for overweight and obese children aged 5-7 years and their families.  
20  
21  
22  
23

## 24 25 **METHODS**

### 26 27 **Recruitment**

28  
29 Families were recruited between 2009 and 2011 using a variety of techniques. MEND  
30 provides recruitment resources such as posters, flyers and letters that can be used within  
31 local networks to support the recruitment process. In addition, support is also provided  
32 detailing effective use of these resources. Children were eligible if they were classified as  
33 overweight or obese (BMI  $\geq 91^{\text{st}}$  percentile) according to the UK 1990 reference data [11];  
34 had no apparent clinical conditions, comorbidities, physical disabilities or learning difficulties  
35 that would interfere with programme engagement and were aged between 5 and 7 years  
36 with at least one parent/carer who was able to attend each of the programme sessions  
37  
38  
39  
40  
41  
42  
43  
44  
45  
46  
47

### 48 49 **Study Design**

50 The study employed an uncontrolled repeated measures design evaluating changes in  
51 anthropometric, psychosocial, physical activity and nutritional outcomes. This study reports  
52 the outcomes of participating children with complete pre- and post-intervention data when  
53 delivered in UK community settings under service level conditions.  
54  
55  
56  
57  
58  
59  
60

## Study Intervention

The MEND 5-7 programme is a comprehensive, multi-component intervention designed to tackle obesity in childhood. The programme supports families by providing information on child nutrition (based on government healthy eating guidelines), active play and parenting practices to help parents practically integrate these recommendations into everyday life. The programme uses a non-diet approach to prevent unduly restrictive eating which can lead to problematic eating behaviours [7].

MEND 5-7 is based around key principles in health-related behaviour change and behavioural parent training programmes. These methods are drawn from evidence-based practices in child psychology and parenting interventions [12].

Reviews of behavioural treatments for childhood obesity show group-based interventions are the most commonly used delivery formats and are more effective than individual treatment sessions [13]. Groups are more efficient, provide greater opportunity for therapeutic interactions between participants, improve attendance rates and are cost-effective[13]. Community groups provide greater access to minority ethnic groups, counter stigma, provide a social support network and aid the therapeutic process of problem-solving [14]. These factors improve understanding of the condition, adherence to the intervention and implementation of changes in behaviour. Recognising the importance of family involvement for behaviour change, the programme requires a parent or carer to attend all sessions.

## Structure and Content

The programme consists of 10 (one hour and forty-five minute duration) weekly group-based sessions delivered by two trained leaders and one optional assistant. The programme is held in community settings such as sports centres and schools for groups of 8-15 children and their parents/carers. The first and last sessions are allocated as introductory and graduation

1  
2  
3 sessions, respectively, incorporating measurements and parental/carer questionnaire  
4 completion.  
5  
6  
7

8  
9 Each session has four components; 'Power Time' (20 minutes), 'Healthy Families' (25  
10 minutes), 'Active Play' and 'Parent/carer Workshop' (during this time children take part in 60  
11 minutes of physical activity and parents/carers attend a workshop). 'Power Time' is a joint  
12 parent/carer and child snack time designed to help parents incorporate evidence-based food  
13 exposure techniques into their daily routines to increase their child's preferences for  
14 healthier foods. 'Healthy Families' is also a joint parent/carer and child session that focuses  
15 on educating and promoting skills for everyday play, active family lifestyles and healthy  
16 family eating in the home environment. 'Active Play' is a child-only play session that takes  
17 place while the parents/carers are in their workshop. The focus is on fun and active  
18 participation. The aim is to provide children with positive experiences of being active in a  
19 supportive setting.  
20  
21  
22  
23  
24  
25  
26  
27  
28  
29  
30  
31  
32

33 The parent/carer workshops include interactive activities and discussions focusing on  
34 nutrition, activity and behaviour change. Five of the parent/carer workshops focus on healthy  
35 eating and nutrition-related topics. Group discussions include practical training on  
36 understanding food and drink labels, fat and sugar content of foods and drinks, portion sizes,  
37 and managing fussy eating. The remaining workshops focus on family rules and routines,  
38 reducing screen time and overcoming barriers to physical activity.  
39  
40  
41  
42  
43  
44  
45  
46  
47

### 48 **Training**

49 The MEND 5-7 programme is delivered by community-based health, education and physical  
50 activity professionals who attend a 2-day, face-to-face training course. The training is  
51 derived from established competency-based skills training methods [15] and includes direct  
52 teaching, role-play, guided discussion and multiple choice assessments. After training, all  
53  
54  
55  
56  
57  
58  
59  
60

1  
2  
3 staff are required to complete an on-line assessment to gain certification to deliver the  
4 programme and pass an enhanced CRB (Criminal Records Bureau) check.  
5  
6  
7

8  
9 Following successful completion of the training, delivery teams are provided with four  
10 manuals, two for programme delivery, one for programme management and one for physical  
11 activity. These resources provide full details of session plans, objectives, direct teaching  
12 notes, desired outcomes, set-up and delivery requirements and all aspects of the physical  
13 activity programme component.  
14  
15  
16  
17  
18

## 21 **Outcome Measurements**

### 23 Demographics

24  
25 Socioeconomic status was determined based on home ownership [16], grouped as: 'owner  
26 occupied', 'private rented', 'social rented' and 'other'. Ethnic background was based on the  
27 UK census categorisation as outlined in the National Obesity Observatory Standard  
28 Evaluation Framework for weight management interventions [16].  
29  
30  
31  
32  
33

### 35 Physical activity and inactivity

36  
37 Physical activity level and sedentary behaviours were assessed using items adapted from  
38 the 'outdoor playtime checklist' [17]. Physical activity was assessed by asking 'How much  
39 time did your child spend playing outside in the yard or street of your house (or the house of  
40 a friend, neighbour or relative), or at the park, playground, or outdoor recreation (e.g.  
41 swimming pool, zoo or amusement park), including while at day care or preschool?'  
42  
43  
44  
45  
46  
47  
48  
49  
50  
51  
52  
53  
54  
55  
56  
57  
58  
59  
60  
61  
62  
63  
64  
65  
66  
67  
68  
69  
70  
71  
72  
73  
74  
75  
76  
77  
78  
79  
80  
81  
82  
83  
84  
85  
86  
87  
88  
89  
90  
91  
92  
93  
94  
95  
96  
97  
98  
99  
100  
101  
102  
103  
104  
105  
106  
107  
108  
109  
110  
111  
112  
113  
114  
115  
116  
117  
118  
119  
120  
121  
122  
123  
124  
125  
126  
127  
128  
129  
130  
131  
132  
133  
134  
135  
136  
137  
138  
139  
140  
141  
142  
143  
144  
145  
146  
147  
148  
149  
150  
151  
152  
153  
154  
155  
156  
157  
158  
159  
160  
161  
162  
163  
164  
165  
166  
167  
168  
169  
170  
171  
172  
173  
174  
175  
176  
177  
178  
179  
180  
181  
182  
183  
184  
185  
186  
187  
188  
189  
190  
191  
192  
193  
194  
195  
196  
197  
198  
199  
200  
201  
202  
203  
204  
205  
206  
207  
208  
209  
210  
211  
212  
213  
214  
215  
216  
217  
218  
219  
220  
221  
222  
223  
224  
225  
226  
227  
228  
229  
230  
231  
232  
233  
234  
235  
236  
237  
238  
239  
240  
241  
242  
243  
244  
245  
246  
247  
248  
249  
250  
251  
252  
253  
254  
255  
256  
257  
258  
259  
260  
261  
262  
263  
264  
265  
266  
267  
268  
269  
270  
271  
272  
273  
274  
275  
276  
277  
278  
279  
280  
281  
282  
283  
284  
285  
286  
287  
288  
289  
290  
291  
292  
293  
294  
295  
296  
297  
298  
299  
300  
301  
302  
303  
304  
305  
306  
307  
308  
309  
310  
311  
312  
313  
314  
315  
316  
317  
318  
319  
320  
321  
322  
323  
324  
325  
326  
327  
328  
329  
330  
331  
332  
333  
334  
335  
336  
337  
338  
339  
340  
341  
342  
343  
344  
345  
346  
347  
348  
349  
350  
351  
352  
353  
354  
355  
356  
357  
358  
359  
360  
361  
362  
363  
364  
365  
366  
367  
368  
369  
370  
371  
372  
373  
374  
375  
376  
377  
378  
379  
380  
381  
382  
383  
384  
385  
386  
387  
388  
389  
390  
391  
392  
393  
394  
395  
396  
397  
398  
399  
400  
401  
402  
403  
404  
405  
406  
407  
408  
409  
410  
411  
412  
413  
414  
415  
416  
417  
418  
419  
420  
421  
422  
423  
424  
425  
426  
427  
428  
429  
430  
431  
432  
433  
434  
435  
436  
437  
438  
439  
440  
441  
442  
443  
444  
445  
446  
447  
448  
449  
450  
451  
452  
453  
454  
455  
456  
457  
458  
459  
460  
461  
462  
463  
464  
465  
466  
467  
468  
469  
470  
471  
472  
473  
474  
475  
476  
477  
478  
479  
480  
481  
482  
483  
484  
485  
486  
487  
488  
489  
490  
491  
492  
493  
494  
495  
496  
497  
498  
499  
500  
501  
502  
503  
504  
505  
506  
507  
508  
509  
510  
511  
512  
513  
514  
515  
516  
517  
518  
519  
520  
521  
522  
523  
524  
525  
526  
527  
528  
529  
530  
531  
532  
533  
534  
535  
536  
537  
538  
539  
540  
541  
542  
543  
544  
545  
546  
547  
548  
549  
550  
551  
552  
553  
554  
555  
556  
557  
558  
559  
560  
561  
562  
563  
564  
565  
566  
567  
568  
569  
570  
571  
572  
573  
574  
575  
576  
577  
578  
579  
580  
581  
582  
583  
584  
585  
586  
587  
588  
589  
590  
591  
592  
593  
594  
595  
596  
597  
598  
599  
600  
601  
602  
603  
604  
605  
606  
607  
608  
609  
610  
611  
612  
613  
614  
615  
616  
617  
618  
619  
620  
621  
622  
623  
624  
625  
626  
627  
628  
629  
630  
631  
632  
633  
634  
635  
636  
637  
638  
639  
640  
641  
642  
643  
644  
645  
646  
647  
648  
649  
650  
651  
652  
653  
654  
655  
656  
657  
658  
659  
660  
661  
662  
663  
664  
665  
666  
667  
668  
669  
670  
671  
672  
673  
674  
675  
676  
677  
678  
679  
680  
681  
682  
683  
684  
685  
686  
687  
688  
689  
690  
691  
692  
693  
694  
695  
696  
697  
698  
699  
700  
701  
702  
703  
704  
705  
706  
707  
708  
709  
710  
711  
712  
713  
714  
715  
716  
717  
718  
719  
720  
721  
722  
723  
724  
725  
726  
727  
728  
729  
730  
731  
732  
733  
734  
735  
736  
737  
738  
739  
740  
741  
742  
743  
744  
745  
746  
747  
748  
749  
750  
751  
752  
753  
754  
755  
756  
757  
758  
759  
760  
761  
762  
763  
764  
765  
766  
767  
768  
769  
770  
771  
772  
773  
774  
775  
776  
777  
778  
779  
780  
781  
782  
783  
784  
785  
786  
787  
788  
789  
790  
791  
792  
793  
794  
795  
796  
797  
798  
799  
800  
801  
802  
803  
804  
805  
806  
807  
808  
809  
810  
811  
812  
813  
814  
815  
816  
817  
818  
819  
820  
821  
822  
823  
824  
825  
826  
827  
828  
829  
830  
831  
832  
833  
834  
835  
836  
837  
838  
839  
840  
841  
842  
843  
844  
845  
846  
847  
848  
849  
850  
851  
852  
853  
854  
855  
856  
857  
858  
859  
860  
861  
862  
863  
864  
865  
866  
867  
868  
869  
870  
871  
872  
873  
874  
875  
876  
877  
878  
879  
880  
881  
882  
883  
884  
885  
886  
887  
888  
889  
890  
891  
892  
893  
894  
895  
896  
897  
898  
899  
900  
901  
902  
903  
904  
905  
906  
907  
908  
909  
910  
911  
912  
913  
914  
915  
916  
917  
918  
919  
920  
921  
922  
923  
924  
925  
926  
927  
928  
929  
930  
931  
932  
933  
934  
935  
936  
937  
938  
939  
940  
941  
942  
943  
944  
945  
946  
947  
948  
949  
950  
951  
952  
953  
954  
955  
956  
957  
958  
959  
960  
961  
962  
963  
964  
965  
966  
967  
968  
969  
970  
971  
972  
973  
974  
975  
976  
977  
978  
979  
980  
981  
982  
983  
984  
985  
986  
987  
988  
989  
990  
991  
992  
993  
994  
995  
996  
997  
998  
999  
1000

1  
2  
3 computer/console games. Answers were given in hours and minutes per day, based on  
4 typical days in the last month. Separate estimates were provided for weekday and weekend  
5 days.  
6  
7  
8  
9

#### 10 Anthropometry

11  
12 Body weight (kg) and height (cm) were measured using standardised procedures [18] and  
13 body mass index calculated as  $\text{body weight}(\text{kg})/\text{height}(\text{m}^2)$ . Waist circumference (cm) was  
14 measured 4 cm above the umbilicus [19]. BMI and waist circumference z-scores were  
15 calculated from UK national reference data [11, 20] using LMS growth software [21].  
16  
17  
18  
19  
20  
21

#### 22 Fruit and vegetable consumption

23  
24 Child and parent fruit and vegetable consumption were assessed by the daily frequency of  
25 portions consumed [22]. Questions were measured on a 7 point likert scale (less than one  
26 per week, one per week, two to three per week, four to six per week, one per day, two per  
27 day, or three or more per day) [22].  
28  
29  
30  
31  
32  
33

#### 34 Parenting self-efficacy

35  
36 Parenting self efficacy was measured using the subscales of 'Play and Enjoyment',  
37 'Discipline and Boundary Setting' and 'Learning and Knowledge' taken from 'TOPSE' (Tool  
38 to Measure Parenting Self Efficacy) [23].  
39  
40  
41  
42  
43  
44

#### 45 Strengths and Difficulties Questionnaire (SDQ)

46  
47 The SDQ – Parent's Version[24]] is a widely used measure of emotional distress in children  
48 and adolescents. The measure consists of 25 statements referring to behaviours associated  
49 with emotional difficulties, such as 'often has temper tantrums or hot tempers' and 'often lies  
50 or cheats'. Parents are asked to indicate how 'true' each statement is of their child on a 3  
51 point likert scale (not true, somewhat true, certainly true). A 'total difficulties' score is  
52 generated, with higher scores indicating greater levels of emotional distress. Measures of  
53  
54  
55  
56  
57  
58  
59  
60

1  
2  
3 psychological distress were included to evaluate the impact of the intervention upon  
4 children's well-being and to ensure that physical health outcomes were not achieved at the  
5 expense of well-being.  
6  
7  
8  
9

### 10 11 **Data Cleaning and statistical analysis**

12 Due to the data being collected under service level conditions by non-researchers,  
13 comprehensive cleaning procedures were undertaken to ensure data quality. Outliers for  
14 anthropometric measurements were identified from visual analysis of histograms and  
15 scatterplots. Visual analysis enabled identification of seven observations that were  
16 inconsistent with other observations in the data set. After comparison to reference growth  
17 charts, these seven data sets were excluded due to biologically unlikely increases in height  
18 of over 5.5 cm over the course of the pre and post measurement sessions. Participants were  
19 excluded from the activity analysis if the addition of reported daily physical activity and  
20 sedentary behaviour exceeded 16 hours, resulting in seven data sets being excluded.  
21  
22  
23  
24  
25  
26  
27  
28  
29  
30  
31

32 Variable distribution was checked using the Kruskal-Wallis test for normality. Paired sample  
33 t-tests were employed to assess mean differences in the outcome variables from baseline to  
34 3 months (end of intervention). Changes in the proportions for fruit and vegetable intake from  
35 baseline to the end of the intervention were assessed using the McNemar's test. Baseline  
36 differences for those who did and did not complete post programme measurements were  
37 examined using independent sample t-tests. Similarly, effects of gender pre-post programme  
38 were examined using independent sample t-tests. Statistical significance was set at  $P <$   
39 0.05. All analyses were conducted using SPSS 18.0 for Windows (SPSS, Chicago, IL).  
40  
41  
42  
43  
44  
45  
46  
47  
48  
49  
50

## 51 **RESULTS**

### 52 **Recruitment**

53 Four hundred and forty children participated in MEND 5-7 programmes across 37 UK  
54 locations.  
55  
56  
57  
58  
59  
60

### **Baseline demographic and anthropometric characteristics**

Fifty-eight percent were female, and 79% of participants were obese (BMI  $\geq$  98<sup>th</sup> centile). Thirty-three percent of children were from non-white ethnic backgrounds with 57% reporting they did not own their home (Table 1).

### **Completers vs. non completers**

There were no significant differences in baseline demographic and anthropometric characteristics between children with complete sets of measurement data and those without. Significant differences were evident in baseline comparisons of physical activity levels (15.0  $\pm$  8.9 hours/week completers vs. 19.3  $\pm$  13.7 hours/week non completers,  $P < 0.01$ ). All other outcome measures were not significantly different at baseline.

### **Attendance and retention**

Attendance data was available for 81% of participants. Mean attendance for the programme was 73% and retention rate (based on children attending at least 7 sessions) was 70%.

### **Outcome measures**

Within subject differences in anthropometric, psychosocial and activity measures pre and post intervention are shown in Table 2. Significant reductions in BMI, BMI z-score, waist circumference, waist z-score and child total difficulties score (all  $P < 0.0001$ ) post intervention were noted. Positive changes were also observed for TV time, sedentary activity ( $P < 0.0001$ ) and physical activity ( $P < 0.01$ ). Significant increases were observed in all parenting self-efficacy domains and the proportion of children and parents eating at least five fruit and vegetables per day (all  $P < 0.0001$ ). There were no gender differences in any of the study outcomes.

## **DISCUSSION**



1  
2  
3 This study examined outcomes following participation in the MEND programme for children  
4 aged 5-7 years old. Positive changes were observed for children's weight status, diet and  
5 activity levels and emotional well-being. Parents also reported an increase in self-efficacy in  
6 relation to their parenting role.  
7  
8  
9

10  
11  
12 Most of the outcome literature on child weight management programmes has been reported  
13 under trial conditions. Outcomes reported in studies of GP-led behavioural treatment of  
14 individual families (LEAP intervention [25]) and in generic parenting programmes unmodified  
15 to deal with the specific needs of obese and overweight children (Triple P) have shown no  
16 significant reductions in measures of degree of obesity. A version of the Triple P programme  
17 specifically adapted for obesity (Lifestyle Triple P) showed a reduction of -0.11 at 20 weeks  
18 [26], the HICKUPS study of a multicomponent group-based parenting intervention reported a  
19 reduction of -0.36 at 6 months and the PEACH study of a parent-only group intervention  
20 showed a reduction of -0.26 at 6 months [27, 28].  
21  
22  
23  
24  
25  
26  
27  
28  
29  
30  
31

32  
33 In the current study, children with complete sets of measurement data had a significant  
34 reduction in BMI z-score of -0.20 after ten weeks. The results presented here were similar to  
35 the unpublished three months data (-0.20) for children taking part in the randomised  
36 controlled trial of the MEND programme for 7 to 13 year old children [29] and it's national  
37 service level evaluation (-0.18) [30]. Although not directly comparable to the treatment  
38 effects reported in experimental studies using intention-to-treat analysis this study suggests  
39 that community level interventions delivered under conditions of normal service delivery may  
40 achieve similar results to those obtained in clinical trials.  
41  
42  
43  
44  
45  
46  
47  
48  
49

50  
51  
52 Generally, interventions that produce greater treatment effects are more intense and involve  
53 relatively higher levels of contact time [31]. The US preventive services task force (USPSTF)  
54 conclude that low intensity interventions – defined as those involving less than 25 hours  
55 direct professional contact time – are insufficient to have a positive impact on weight-status  
56  
57  
58  
59  
60

1  
2  
3 in obese and overweight children. The MEND 5-7 programme consists of 17.5 hours of face-  
4 to-face contact time and demonstrated significant reductions in zBMI for the 62% of children  
5 with complete sets of measurement data. Contrary to USPTS recommendations this  
6 suggests that clinically meaningful outcomes may be achievable by low intensity  
7 interventions.  
8  
9  
10  
11  
12

13  
14  
15 MEND 5-7 has been designed to be delivered by community-based, non-obesity specialists  
16 in contrast to other studies that have used highly skilled professionals to deliver the  
17 intervention [27, 28]. A large proportion of childhood obesity interventions employ intensive  
18 programmes involving specialist dieticians and other health professionals [32]. Childhood  
19 obesity interventions are significantly more expensive when skilled professionals and  
20 additional contact hours are employed. In an increasingly resource-constrained public-sector  
21 environment, these factors might limit the potential reach of evidence-based programmes  
22 [32]. The development of a clinically effective, low-intensity programme using non-specialist,  
23 community-based delivery staff could be a crucial strategy to meet the needs of younger  
24 children who are already overweight. The present results suggest that clinically meaningful  
25 outcomes may be achievable by low intensity interventions delivered by non-specialist staff.  
26 Further research would be desirable to explore whether these initially promising data could  
27 be independently replicated under service level conditions.  
28  
29  
30  
31  
32  
33  
34  
35  
36  
37  
38  
39  
40  
41  
42

43 The UK Department of Health physical activity guidelines specify that children and young  
44 people (5-18 years old) should engage in 60 minutes of activity per day whilst minimising  
45 sedentary behaviours [33]. Sedentary behaviours - in particular, time spent watching  
46 television - are associated with metabolic risk factors in children [34] and have been shown  
47 to predict BMI in early adulthood [35]. Independent of TV viewing time, higher levels of  
48 sedentary behaviours have been shown to lower levels of physical activity in children [36].  
49  
50  
51  
52  
53  
54  
55  
56  
57  
58  
59  
60

1  
2  
3 There is also evidence that participation in physical activity leads to health benefits [37] and  
4 lowers levels of overweight and obesity in children [38]. In this study, participation in MEND  
5 5-7 was associated with significant, positive changes in physical activity levels ( $P < 0.01$ ), TV  
6 viewing time and sedentary activity levels ( $P < 0.0001$ ). Parents reported children on the  
7 programme had reduced sedentary behaviour by an average of 4.1 hours, of which 3.4  
8 hours was television viewing, and increased their physical activity levels by 2.9 hours per  
9 week. Such reductions in sedentary activity and increase in physical activity during  
10 participation in the programme is very encouraging.  
11  
12  
13  
14  
15  
16  
17  
18  
19  
20  
21

22 Some limitations of the study should be acknowledged. Only 62% of participants who started  
23 the programme completed post programme measurements. This level of completion is not  
24 atypical for a pilot study or reports of service-level implementation [39, 40] but may be a  
25 source of bias that could lead to an overestimation of treatment effect. Statistical analyses  
26 revealed that there were limited differences between those participants that completed the  
27 programme and those who did not. The data presented here are uncontrolled data  
28 representing the short-term impact of the intervention for children with complete sets of  
29 measurement data. Controlled studies of the impact beyond the ten week programme are  
30 needed to establish whether the present results are sustained and more effective than no or  
31 an alternative intervention. Whilst it is well documented that subjective measures of physical  
32 activity over-report when compared to more accurate objectively measured physical activity  
33 [41], subjective measurement can be a useful and cost effective tool when employed in a  
34 community-based programme if it is not feasible to obtain objective measurements [42]. The  
35 improvements found in physical activity and sedentary behaviours require supporting  
36 evidence using objective measurement.  
37  
38  
39  
40  
41  
42  
43  
44  
45  
46  
47  
48  
49  
50  
51  
52  
53  
54

## 55 CONCLUSION

56  
57  
58  
59  
60

1  
2  
3 Participation in the MEND 5-7 programme was associated with beneficial changes in  
4 physical, behavioural and psychological outcomes for children with complete sets of  
5 measurement data, when implemented in UK community settings under service level  
6 conditions. The findings presented warrant further evaluation in a formal trial to establish if  
7 the observed outcomes would have occurred in the absence of intervention, are replicable  
8 across varying ethnic and socioeconomic groups, are sustainable and are cost-effective,  
9 Further, process evaluation of programme implementation will also establish if the delivery  
10 model, using non-obesity specialists, can provide a scalable and suitable care pathway for  
11 families of overweight and obese children on a national level.  
12  
13  
14  
15  
16  
17  
18  
19  
20  
21  
22  
23

### 24 **Acknowledgements**

25  
26  
27 We would like to thank Dr Venediktos Kapetanakis for his statistical advice. We would also  
28 like to thank all the families who took part in the MEND 5-7 programme.  
29  
30  
31

### 32 **Funding**

33  
34 This evaluation received no specific grant from any funding agency. Researchers (authors)  
35 were all funded as employees of MEND Central Ltd. Programmes were primary funded by  
36 UK Primary Care Trusts and Local Authorities (approximately 80% and 10%, respectively).  
37 Additional programmes were funded from a variety of sources including local Leisure  
38 Providers and Private Sector Companies.  
39  
40  
41  
42  
43  
44  
45

### 46 **Data Sharing Statement**

47  
48 No additional data available.  
49  
50

### 51 **Ethical Approval**

1  
2  
3 This study is a service evaluation and not within the remit of UK Ethics Committee  
4 governance. Parents consented to take part in the study and for use of their anonymised  
5 data.  
6  
7  
8

### 9 10 **Contributors**

11  
12 L Smith performed statistical analysis and contributed to writing the paper. P Chadwick co-  
13 developed the intervention and contributed to writing the paper, interpretation and analysis of  
14 results. D Radley contributed to writing the paper and statistical analysis. M Kolotourou  
15 critically reviewed all parts of the paper and assisted in the interpretation and analysis of the  
16 results. C Gammon contributed to the interpretation of the results and critically reviewed all  
17 parts of the paper. J Rosborough co-developed the intervention and critically reviewed all  
18 parts of the paper. P Sacher co-developed the intervention, contributed to the interpretation  
19 of the results and writing the paper and critically reviewed all parts of the paper. All authors  
20 approved the final draft of the paper.  
21  
22  
23  
24  
25  
26  
27  
28  
29  
30

### 31 32 **Competing interests**

33  
34 Dr. Lindsey Smith, Dr. Duncan Radley, Catherine Gammon and Jennifer Rosborough are  
35 employed full-time at MEND. Dr. Paul Chadwick is currently employed part-time as Clinical  
36 Director at MEND. Maria Kolotourou is employed part-time at MEND. Paul Sacher is  
37 currently employed as a Senior Research Fellow at the UCL Institute of Child Health as well  
38 as Chief Research and Development Officer at MEND. Dr Venediktos Kapetanakis serves  
39 as a consultant statistician to MEND.  
40  
41  
42  
43  
44  
45  
46  
47  
48  
49  
50  
51  
52  
53  
54  
55  
56  
57  
58  
59  
60

## REFERENCES

1. Abrams, P. and L.E. Levitt Katz, *Metabolic effects of obesity causing disease in childhood*. *Curr Opin Endocrinol Diabetes Obes*, 2011. **18**(1): p. 23-7.
2. Reilly, J.J., et al., *Health consequences of obesity*. *Arch Dis Child*, 2003. **88**(9): p. 748-52.
3. Olds, T., et al., *Evidence that the prevalence of childhood overweight is plateauing: data from nine countries*. *Int J Pediatr Obes*, 2011. **6**(5-6): p. 342-60.
4. NHS, *National Child Measurement Programme*, 2011, Crown copyright.
5. Chomitz, V.R., et al., *Healthy Living Cambridge Kids: a community-based participatory effort to promote healthy weight and fitness*. *Obesity* (Silver Spring), 2010. **18 Suppl 1**: p. S45-53.
6. Waters, E., et al., *Interventions for preventing obesity in children*. *Cochrane Database Syst Rev*, 2011. **12**: p. CD001871.
7. NICE *National Institute for Health and Clinical Excellence (NICE) guidance. Obesity: the prevention, identification, assessment and management of overweight and obesity in adults and children*. 2006.
8. Barlow, S.E., *Expert committee recommendations regarding the prevention, assessment, and treatment of child and adolescent overweight and obesity: summary report*. *Pediatrics*, 2007. **120 Suppl 4**: p. S164-92.
9. Aicken, C., L. Arai, and H. Roberts, *Schemes to promote healthy weight among obese and overweight children in England*. EPPI-Centre report, Social Science Research Unit, 2008: p. 1-37.
10. Cross-Government Obesity Unit, *Healthy Weight, Healthy Lives: Child weight management programme and training providers framework*. 2009.
11. Cole, T.J., J.V. Freeman, and M.A. Preece, *Body mass index reference curves for the UK, 1990*. *Arch Dis Child*, 1995. **73**(1): p. 25-9.
12. NICE *Parent-training/education programmes in the management of children with conduct disorders. Technology appraisals guidance 102*. 2006.
13. Robinson, T.N., *Behavioural treatment of childhood and adolescent obesity*. *Int J Obes Relat Metab Disord*, 1999. **23 Suppl 2**: p. S52-7.
14. Levine, M., D.D. Perkins, and D.V. Perkins, *Principles of community psychology: Perspectives and applications* 3rd ed. 2005, New York: Oxford University Press.
15. Leung, W.C., *Competency based medical training: review*. *BMJ*, 2002. **325**(7366): p. 693-6.
16. National Obesity Observatory *Standard evaluation framework*. 2009.
17. Burdette, H.L. and R.C. Whitaker, *Neighborhood playgrounds, fast food restaurants, and crime: relationships to overweight in low-income preschool children*. *Prev Med*, 2004. **38**(1): p. 57-63.
18. Lohman, T., A.F. Roche, and R. Martorell, *Anthropometric standardization reference manual*, 1988, Human Kinetics Books, Champaign, IL
19. Rudolf, M.C., J. Walker, and T.J. Cole, *What is the best way to measure waist circumference?* *Int J Pediatr Obes*, 2007. **2**(1): p. 58-61.
20. McCarthy, H.D., K.V. Jarrett, and H.F. Crawley, *The development of waist circumference percentiles in British children aged 5.0-16.9 y*. *Eur J Clin Nutr*, 2001. **55**(10): p. 902-7.
21. Pan H, C.T. *LMSgrowth: a Microsoft Excel add-in to access growth references based on the LMS method. Version 2.74*.
22. Sweetman, C., et al., *Characteristics of family mealtimes affecting children's vegetable consumption and liking*. *J Am Diet Assoc*, 2011. **111**(2): p. 269-73.
23. Kendall, S. and L. Bloomfield, *Developing and validating a tool to measure parenting self-efficacy*. *J Adv Nurs*, 2005. **51**(2): p. 174-81.
24. Goodman, R., *The Strengths and Difficulties Questionnaire: a research note*. *J Child Psychol Psychiatry*, 1997. **38**(5): p. 581-6.

- 1
  - 2
  - 3
  - 4
  - 5
  - 6
  - 7
  - 8
  - 9
  - 10
  - 11
  - 12
  - 13
  - 14
  - 15
  - 16
  - 17
  - 18
  - 19
  - 20
  - 21
  - 22
  - 23
  - 24
  - 25
  - 26
  - 27
  - 28
  - 29
  - 30
  - 31
  - 32
  - 33
  - 34
  - 35
  - 36
  - 37
  - 38
  - 39
  - 40
  - 41
  - 42
  - 43
  - 44
  - 45
  - 46
  - 47
  - 48
  - 49
  - 50
  - 51
  - 52
  - 53
  - 54
  - 55
  - 56
  - 57
  - 58
  - 59
  - 60
25. McCallum, Z., et al., *Outcome data from the LEAP (Live, Eat and Play) trial: a randomized controlled trial of a primary care intervention for childhood overweight/mild obesity*. *Int J Obes (Lond)*, 2007. **31**(4): p. 630-6.
26. West, F., et al., *Randomised clinical trial of a family-based lifestyle intervention for childhood obesity involving parents as the exclusive agents of change*. *Behav Res Ther*, 2010. **48**(12): p. 1170-9.
27. Okely, A.D., et al., *Multi-site randomized controlled trial of a child-centered physical activity program, a parent-centered dietary-modification program, or both in overweight children: the HIKCUPS study*. *J Pediatr*, 2010. **157**(3): p. 388-94, 394 e1.
28. Magarey, A.M., et al., *A parent-led family-focused treatment program for overweight children aged 5 to 9 years: the PEACH RCT*. *Pediatrics*, 2011. **127**(2): p. 214-22.
29. Sacher, P.M., et al., *Randomized controlled trial of the MEND program: a family-based community intervention for childhood obesity*. *Obesity (Silver Spring)*, 2010. **18 Suppl 1**: p. S62-8.
30. Sacher, P., et al., *Evaluating the effectiveness of the scale-up and spread of the MEND 7-13 childhood obesity program: UK national data (2007-2010)*. *Obesity (Silver Spring)*, 2011. **19**(S1): p. S52.
31. Whitlock, E.P., et al., *Effectiveness of weight management interventions in children: a targeted systematic review for the USPSTF*. *Pediatrics*, 2010. **125**(2): p. e396-418.
32. Taveras, E.M., et al., *Randomized controlled trial to improve primary care to prevent and manage childhood obesity: the High Five for Kids study*. *Arch Pediatr Adolesc Med*, 2011. **165**(8): p. 714-22.
33. DoH, *Start Active, Stay Active - A report on physical activity for health from the four home countries' Chief Medical Officers*. Crown Copyright, 2011.
34. Ekelund, U., et al., *TV viewing and physical activity are independently associated with metabolic risk in children: the European Youth Heart Study*. *PLoS Med*, 2006. **3**(12): p. e488.
35. Hancox, R.J., B.J. Milne, and R. Poulton, *Association between child and adolescent television viewing and adult health: a longitudinal birth cohort study*. *Lancet*, 2004. **364**(9430): p. 257-62.
36. Jago, R., et al., *Sedentary behavior, not TV viewing, predicts physical activity among sedentary 3-to 7-year-old children*. *Pediatric Exercise Science*, 2005. **17**: p. 364-376.
37. Janssen, I. and A.G. Leblanc, *Systematic review of the health benefits of physical activity and fitness in school-aged children and youth*. *Int J Behav Nutr Phys Act*, 2010. **7**: p. 40.
38. Hills, A.P., L.B. Andersen, and N.M. Byrne, *Physical activity and obesity in children*. *Br J Sports Med*, 2011. **45**(11): p. 866-70.
39. Robertson, W., et al., *Pilot of "Families for Health": community-based family intervention for obesity*. *Arch Dis Child*, 2008. **93**(11): p. 921-6.
40. Watson, P.M., et al., *A whole family approach to childhood obesity management (GOALS): relationship between adult and child BMI change*. *Ann Hum Biol*, 2011. **38**(4): p. 445-52.
41. Adamo, K.B., et al., *A comparison of indirect versus direct measures for assessing physical activity in the pediatric population: a systematic review*. *Int J Pediatr Obes*, 2009. **4**(1): p. 2-27.
42. van Sluijs, E.M., A.M. McMinn, and S.J. Griffin, *Effectiveness of interventions to promote physical activity in children and adolescents: systematic review of controlled trials*. *Br J Sports Med*, 2008. **42**(8): p. 653-7.

**Table 1.** Baseline demographic and anthropometric characteristics

|                             | % (n <sup>1</sup> ) or mean (SD) |
|-----------------------------|----------------------------------|
| Gender                      |                                  |
| Males                       | 42.0 % (185)                     |
| Females                     | 58.0 % (255)                     |
| Ethnicity                   |                                  |
| White – British             | 67.2 % (275)                     |
| Black                       | 6.6 % (27)                       |
| Asian                       | 19.6 % (80)                      |
| Mixed                       | 5.1 % (21)                       |
| Other                       | 1.5 % (6)                        |
| House ownership             |                                  |
| Owner occupied              | 43.2 % (162)                     |
| Private rented              | 25.9 % (97)                      |
| Social rented               | 30.1 % (113)                     |
| Other                       | 0.8 % (3)                        |
| Age (years)                 | 6.1 (0.8)                        |
| Weight (kg)                 | 33.0 (7.9)                       |
| Height (cm)                 | 120.7 (7.7)                      |
| BMI (kg/m <sup>2</sup> )    | 22.5 (3.6)                       |
| BMI z-score                 | 2.86 (0.91)                      |
| Waist circumference (cm)    | 70.4 (9.5)                       |
| Waist circumference z-score | 3.13 (1.09)                      |

<sup>1</sup>n = 440, baseline n may vary due to missing data and data cleaning procedures.



**Table 2.** Within subject changes at pre and post intervention

|                                              | n <sup>1</sup> | Pre         | Post        | Difference             |         |
|----------------------------------------------|----------------|-------------|-------------|------------------------|---------|
|                                              |                | Mean (SD)   | Mean (SD)   | Mean (CI)              | P       |
| <b>Anthropometry</b>                         |                |             |             |                        |         |
| BMI (kg/m <sup>2</sup> )                     | 274            | 22.5 (3.6)  | 22.1 (3.7)  | -0.5 (-0.6 to -0.4)    | <0.0001 |
| BMI z-score                                  | 274            | 2.86 (0.90) | 2.66 (0.94) | -0.20 (-0.23 to -0.17) | <0.0001 |
| Waist circumference (cm)                     | 267            | 70.9 (9.9)  | 69.9 (10.0) | -0.9 (-1.3 to -0.5)    | <0.0001 |
| Waist circumference z-score                  | 267            | 3.16 (1.10) | 2.96 (1.14) | -0.20 (-0.25 to -0.15) | <0.0001 |
| <b>Psychosocial indices</b>                  |                |             |             |                        |         |
| Child total difficulties score (range 0-40)  | 212            | 10.8 (5.7)  | 9.2 (5.8)   | -1.6 (-2.2 to -0.9)    | <0.0001 |
| Play and enjoyment score (range 0-60)        | 240            | 48.6 (10.4) | 51.6 (9.1)  | 3.1 (1.9 to 4.2)       | <0.0001 |
| Discipline and boundaries score (range 0-60) | 235            | 42.0 (11.9) | 47.3 (9.7)  | 5.3 (4.0 to 6.6)       | <0.0001 |
| Learning and knowledge score (range 0-60)    | 238            | 48.7 (9.2)  | 51.1 (8.3)  | 2.5 (1.3 to 3.7)       | <0.0001 |
| <b>Activity indices</b>                      |                |             |             |                        |         |
| Sedentary activity (hours/week)              | 168            | 21.6 (12.8) | 17.5 (10.8) | -4.1 (-6.1 to -2.2)    | <0.0001 |
| Physical activity (hours/week)               | 168            | 15.1 (8.8)  | 18.0 (9.4)  | 2.9 (1.2 to 4.7)       | <0.01   |
| TV time (hours/week)                         | 168            | 16.6 (10.9) | 13.2 (9.0)  | -3.4 (-5.0 to -1.8)    | <0.0001 |

<sup>1</sup> numbers vary due to missing data and data cleaning procedures

1  
2  
3 | **Assessing the short-term ~~effects~~ outcomes of a ~~scalable~~, community-based**  
4 **intervention for overweight and obese children: The MEND 5-7 programme.**  
5  
6

7 Smith LR<sup>1,2</sup>, Chadwick P<sup>2,3</sup>, Radley D<sup>1,2</sup>, Kolotourou M<sup>2</sup>, Gammon CS<sup>2</sup>, Rosborough J<sup>2</sup>,  
8 Sacher PM<sup>1,2</sup>,  
9

10 <sup>1</sup>Childhood Nutrition Research Centre, Institute of Child Health, University College London,  
11 United Kingdom. <sup>2</sup>MEND Central, United Kingdom. <sup>3</sup>Cancer Research, UK Health Behaviour  
12 Unit, University College London, United Kingdom.  
13  
14

15  
16  
17 **Corresponding author:** PM Sacher, MEND Central Ltd, Unit 21 Tower Workshops, 58 Riley  
18 Road, London, SE1 3DG. Telephone: 020 7231 7225, Fax: 020 7394 7616, Email:  
19 paul.sacher@mendcentral.org.  
20  
21  
22  
23

24  
25  
26  
27 Keywords: childhood, obesity, intervention, community programme  
28

29 | Word count: 3,112,977  
30  
31  
32  
33  
34  
35  
36  
37  
38  
39  
40  
41  
42  
43  
44  
45  
46  
47  
48  
49  
50  
51  
52  
53  
54  
55  
56  
57  
58  
59  
60

**ABSTRACT**

**Objective** The aim of this study was to report outcomes of the UK service level delivery of MEND (Mind, Exercise, Nutrition...Do it!) 5-7, a multicomponent community-based, healthy lifestyle intervention designed for overweight and obese children aged 5-7 years and their families.

**Design** Repeated measures ~~Pre-post study design.~~

**Setting** Community venues at 37 locations across the UK.

**Participants** 440 overweight or obese children (42% boys; mean age 6.1 years; BMI z-score 2.86) and their parents/carers participated in the intervention.

**Intervention** MEND 5-7 is a 10-week, family-based, child weight-management intervention consisting of weekly group sessions. It includes positive parenting, active play, nutrition education and behaviour change strategies. The intervention is designed to be scalable and delivered by a range of health and social care professionals.

**Primary and secondary outcome measures** The primary outcome was BMI z-score. Secondary outcome measures included BMI, waist circumference, waist circumference z-score, children's psychological symptoms, parenting self-efficacy, physical activity and sedentary behaviours and the proportion of parents and children eating 5 or more portions of fruit and vegetables.

**Results:** 274 (62%) children were measured pre and post-intervention (baseline; 10-weeks). Post-intervention, mean BMI and waist circumference decreased by 0.5 kg/m<sup>2</sup> and 0.9 cm, while z-scores decreased by 0.20 and 0.20, respectively (p<0.0001). Improvements were found in children's psychological symptoms (-1.6 units, p<0.0001), parent self-efficacy (p<0.0001), physical activity (+2.9 hours/week, p<0.01), sedentary activities (-4.1 hours/week, p<0.0001) and the proportion of parents and children eating 5 or more portions of fruit and vegetables per day (both p<0.0001). Attendance to the 10 sessions was 73% with a 70% retention rate.

**Conclusions:** Participation in the MEND 5-7 programme was associated with beneficial changes in physical, behavioural and psychological outcomes for children with complete sets

1  
2  
3 of measurement data, when implemented in UK community settings under service level  
4 conditions ~~These findings suggest that when implemented under service level conditions the~~  
5 ~~MEND 5-7 programme was acceptable to families with beneficial effects on physical,~~  
6 ~~behavioural and psychological outcomes when delivered at scale.~~ Further investigation is  
7  
8  
9 warranted to establish if these findings are replicable under controlled conditions.  
10  
11  
12

## 13 14 15 16 17 **Article Summary**

### 18 **Article Focus**

- 19 • Childhood obesity prevalence rates remain high in the UK and globally.
- 20 • To our knowledge there are no published, peer-reviewed weight management trials or  
21 service level evaluations for children aged 5-7 in England.  
22  
23

### 24 **Key messages**

- 25 • The MEND 5-7 programme has high attendance and retention rates ~~was acceptable to~~  
26 ~~families and had produced positive changes in~~ ~~beneficial effects on~~ physical, behavioural  
27 and psychological outcomes ~~when delivered at scale.~~
- 28 • This study demonstrates that a community-based intervention delivered by non-obesity  
29 specialists has the a potentially valuable contribution to make ~~potential to provide a~~  
30 ~~scalable and suitable~~ as part of a comprehensive care pathway for families of overweight  
31 and obese children.  
32  
33  
34  
35  
36  
37  
38  
39  
40  
41  
42  
43

### 44 **Strengths and limitations**

#### 45 Strengths

- 46 • A strength of the study is that it utilises 'real world' data representative of childhood  
47 community based interventions that are scalable to reduce childhood obesity levels. By  
48 using service-level data this study contributes to the literature on appropriate targets for  
49 community level interventions.  
50  
51  
52  
53  
54  
55  
56  
57  
58  
59  
60

- 1  
2  
3  
4  
5  
6  
7  
8  
9  
10  
11  
12  
13  
14  
15  
16  
17  
18
- Most of the outcome literature on community-based child weight management programmes have been delivered by highly-skilled professionals under trial conditions. This limits the conclusions that can be drawn about whether such outcomes can be translated to community settings under different conditions of service delivery. The results of this paper suggest that outcomes similar to those achieved by controlled trials can be achieved under conditions of normal service delivery. An additional strength is that MEND 5-7 was delivered by community-based, non-obesity specialists in contrast to other studies that have used highly skilled professionals to deliver the intervention

19  
20

#### Limitations

- 21  
22  
23  
24  
25  
26  
27  
28  
29  
30  
31  
32
- Only 62% of participants who started the programme completed post programme measurements. Although this level of completion is not atypical for reports of service-level implementation it is still possible that biases due to selective attrition -but may be a source of bias that could lead to an overestimation of treatment effect.

33  
34

## **INTRODUCTION**

35  
36  
37  
38  
39  
40  
41  
42  
43  
44  
45  
46  
47  
48  
49  
50  
51  
52  
53  
54  
55  
56  
57  
58  
59  
60

Childhood obesity is associated with adverse effects on short and long term health [1, 2]. Prevalence rates continue to be high globally and more specifically in the UK [3]. In 2005, the Department of Health initiated the National Child Measurement Programme (NCMP) to identify school children in Reception (typically aged 4-5 years) and Year 6 (aged 10-11 years) who are overweight or obese in England [4]. Since its inception, results from the NCMP have indicated high levels of overweight and obesity in both age groups - the most recent findings (school year 2010/2011) identifying 22.6% and 33.4% of Reception and Year 6 children as overweight or obese, respectively. Surveillance programmes have evolved into screening programmes with a high proportion of UK primary care trusts choosing to inform parents of their child's weight status. Although this practice is controversial it is also the case that identification may be a trigger for parents to initiate lifestyle change and/or seek professional support [5].

1  
2  
3  
4  
5 Research has indicated that there may be an effectiveness gradient with regard to the  
6 impact of child obesity treatment with age [6]. Generally, earlier treatment is associated with  
7 better outcomes following programmes that are less intensive. To be effective, it is  
8 recommended that interventions are multicomponent and include age-appropriate nutrition  
9 and physical activity with behaviour change strategies that are developmentally appropriate  
10 to the cognitive abilities of the child and the nature of relationships in the family life cycle [7,  
11 8]. Although the availability of treatments is steadily increasing, there are significant  
12 disparities in the availability of treatments across the developmental continuum. In the UK  
13 only 8 out of 45 weight management schemes cover the 5 to 7 age range [9] and only four  
14 out of the 13 Department of Health approved Child Weight Management programmes are  
15 suitable for children under the age of 7 [10]. To our knowledge there are no published, peer-  
16 reviewed weight management trials or service level evaluations for children aged 5-7 in  
17 England. This leaves a gap in the understanding of the outcomes that is possible to achieve  
18 for overweight and obese children in this age range in a UK setting.  
19  
20  
21  
22  
23  
24  
25  
26  
27  
28  
29  
30  
31  
32  
33  
34

35 The aim of this study was to report outcomes from the UK service level delivery of MEND 5-  
36 7 (Mind, Exercise, Nutrition... Do it!), a multicomponent community-based healthy lifestyle  
37 intervention designed for overweight and obese children aged 5-7 years and their families.  
38  
39  
40  
41  
42

## 43 **METHODS**

### 44 **Recruitment**

45 Families were recruited between 2009 and 2011 using a variety of techniques. MEND  
46 provides recruitment resources such as posters, flyers and letters that can be used within  
47 local networks to support the recruitment process. In addition, support is also provided  
48 detailing effective use of these resources. Children were eligible if they were classified as  
49 overweight or obese (BMI  $\geq 91^{\text{st}}$  percentile) according to the UK 1990 reference data [11];  
50 had no apparent clinical conditions, comorbidities, physical disabilities or learning difficulties  
51  
52  
53  
54  
55  
56  
57  
58  
59  
60

1  
2  
3 that would interfere with programme engagement and were aged between 5 and 7 years  
4  
5 with at least one parent/carer who was able to attend each of the programme sessions  
6  
7

### 8 9 **Study Design**

10  
11 The study employed an uncontrolled repeated measures design evaluating changes in  
12 anthropometric, psychosocial, physical activity and nutritional outcomes. This study reports  
13 the outcomes -effects of participating children with complete pre- and post-intervention data  
14 ~~the programme~~ when delivered in UK community settings under service level conditions.  
15  
16  
17  
18  
19

### 20 21 **Study Intervention**

22  
23 The MEND 5-7 programme is a comprehensive, multi-component intervention designed to  
24 tackle obesity in childhood. The programme supports families by providing information on  
25 child nutrition (based on government healthy eating guidelines), active play and parenting  
26 practices to help parents practically integrate these recommendations into everyday life. The  
27 programme uses a non-diet approach to prevent unduly restrictive eating which can lead to  
28 problematic eating behaviours [7].  
29  
30  
31  
32  
33  
34  
35  
36

37  
38 MEND 5-7 is based around key principles in health-related behaviour change and  
39 behavioural parent training programmes. These methods are drawn from evidence-based  
40 practices in child psychology and parenting interventions [12].  
41  
42  
43  
44

45  
46 Reviews of behavioural treatments for childhood obesity show group-based interventions are  
47 the most commonly used delivery formats and are more effective than individual treatment  
48 sessions [13]. Groups are more efficient, provide greater opportunity for therapeutic  
49 interactions between participants, improve attendance rates and are cost-effective[13].  
50 Community groups provide greater access to minority ethnic groups, counter stigma, provide  
51 a social support network and aid the therapeutic process of problem-solving [14]. These  
52 factors improve understanding of the condition, adherence to the intervention and  
53  
54  
55  
56  
57  
58  
59  
60

1  
2  
3 implementation of changes in behaviour. Recognising the importance of family involvement  
4  
5 for behaviour change, the programme requires a parent or carer to attend all sessions.  
6  
7

### 8 9 **Structure and Content**

10  
11 The programme consists of 10 (one hour and forty-five minute duration) weekly group-based  
12  
13 sessions delivered by two trained leaders and one optional assistant. The programme is held  
14  
15 in community settings such as sports centres and schools for groups of 8-15 children and  
16  
17 their parents/carers. The first and last sessions are allocated as introductory and graduation  
18  
19 sessions, respectively, incorporating measurements and parental/carers questionnaire  
20  
21 completion.  
22  
23

24  
25 Each session has four components; 'Power Time' (20 minutes), 'Healthy Families' (25  
26  
27 minutes), 'Active Play' and 'Parent/carers Workshop' (during this time children take part in 60  
28  
29 minutes of physical activity and parents/carers attend a workshop). 'Power Time' is a joint  
30  
31 parent/carers and child snack time designed to help parents incorporate evidence-based food  
32  
33 exposure techniques into their daily routines to increase their child's preferences for  
34  
35 healthier foods. 'Healthy Families' is also a joint parent/carers and child session that focuses  
36  
37 on educating and promoting skills for everyday play, active family lifestyles and healthy  
38  
39 family eating in the home environment. 'Active Play' is a child-only play session that takes  
40  
41 place while the parents/carers are in their workshop. The focus is on fun and active  
42  
43 participation. The aim is to provide children with positive experiences of being active in a  
44  
45 supportive setting.  
46  
47

48  
49 The parent/carers workshops include interactive activities and discussions focusing on  
50  
51 nutrition, activity and behaviour change. Five of the parent/carers workshops focus on healthy  
52  
53 eating and nutrition-related topics. Group discussions include practical training on  
54  
55 understanding food and drink labels, fat and sugar content of foods and drinks, portion sizes,  
56  
57  
58  
59  
60



1  
2  
3 and managing fussy eating. The remaining workshops focus on family rules and routines,  
4  
5 reducing screen time and overcoming barriers to physical activity.  
6  
7

## 8 9 **Training**

10  
11 The MEND 5-7 programme is delivered by community-based health, education and physical  
12  
13 activity professionals who attend a 2-day, face-to-face training course. The training is  
14  
15 derived from established competency-based skills training methods [15] and includes direct  
16  
17 teaching, role-play, guided discussion and multiple choice assessments. After training, all  
18  
19 staff are required to complete an on-line assessment to gain certification to deliver the  
20  
21 programme and pass an enhanced CRB (Criminal Records Bureau) check.  
22  
23

24  
25 Following successful completion of the training, delivery teams are provided with four  
26  
27 manuals, two for programme delivery, one for programme management and one for physical  
28  
29 activity. These resources provide full details of session plans, objectives, direct teaching  
30  
31 notes, desired outcomes, set-up and delivery requirements and all aspects of the physical  
32  
33 activity programme component.  
34  
35

## 36 37 **Outcome Measurements**

### 38 39 Demographics

40  
41 Socioeconomic status was determined based on home ownership [16], grouped as: 'owner  
42  
43 occupied', 'private rented', 'social rented' and 'other'. Ethnic background was based on the  
44  
45 UK census categorisation as outlined in the National Obesity Observatory Standard  
46  
47 Evaluation Framework for weight management interventions [16].  
48  
49

### 50 51 Physical activity and inactivity

52  
53 Physical activity level and sedentary behaviours were assessed using items adapted from  
54  
55 the 'outdoor playtime checklist' [17]. Physical activity was assessed by asking 'How much  
56  
57 time did your child spend playing outside in the yard or street of your house (or the house of  
58  
59  
60

1  
2  
3 a friend, neighbour or relative), or at the park, playground, or outdoor recreation (e.g.  
4 swimming pool, zoo or amusement park), including while at day care or preschool?  
5  
6  
7 Television viewing time and time spent playing computer/console game were assessed by  
8  
9 asking 'How much time would you say your child spends watching television (including  
10 videos and DVD's), including time spent watching TV in other people's houses?' and 'How  
11 much time did your child spend playing Play-Station/X-box/Nintendo/Computer games  
12 (including watching a friend/brother/sister/adult play, and at other people's houses)?' Total  
13 sedentary activity was calculated from the addition of TV viewing time and time spent playing  
14 computer/console games. Answers were given in hours and minutes per day, based on  
15 typical days in the last month. Separate estimates were provided for weekday and weekend  
16 days.  
17  
18  
19  
20  
21  
22  
23  
24  
25  
26

#### 27 Anthropometry

28  
29 Body weight (kg) and height (cm) were measured using standardised procedures [18] and  
30 body mass index calculated as  $\text{body weight}(\text{kg})/\text{height}(\text{m}^2)$ . Waist circumference (cm) was  
31 measured 4 cm above the umbilicus [19]. BMI and waist circumference z-scores were  
32 calculated from UK national reference data [11, 20] using LMS growth software [21].  
33  
34  
35  
36  
37  
38  
39

#### 40 Fruit and vegetable consumption

41 Child and parent fruit and vegetable consumption were assessed by the daily frequency of  
42 portions consumed [22]. Questions were measured on a 7 point likert scale (less than one  
43 per week, one per week, two to three per week, four to six per week, one per day, two per  
44 day, or three or more per day) [22].  
45  
46  
47  
48  
49  
50

#### 51 Parenting self-efficacy

52 Parenting self efficacy was measured using the subscales of 'Play and Enjoyment',  
53 'Discipline and Boundary Setting' and 'Learning and Knowledge' taken from 'TOPSE' (Tool  
54 to Measure Parenting Self Efficacy) [23].  
55  
56  
57  
58  
59  
60

1  
2  
3  
4  
5 Strengths and Difficulties Questionnaire (SDQ)

6  
7 The SDQ – Parent’s Version[24]] provides is a widely used a measure of emotional distress  
8  
9 in children and adolescents. The measure consists of 25 statements referring to behaviours  
10  
11 associated with emotional difficulties, such as ‘often has temper tantrums or hot tempers’  
12  
13 and ‘often lies or cheats’. Parents are asked to indicate how ‘true’ each statement is of their  
14  
15 child on a 3 point likert scale (not true, somewhat true, certainly true). A ‘total difficulties’  
16  
17 score is generated, with higher scores indicating greater levels of emotional distress.  
18  
19 Measures of psychological distress were included to evaluate the impact of the intervention  
20  
21 upon children’s well-being and to ensure that physical health outcomes were not achieved at  
22  
23 the expense of well-being.  
24

### 25 26 27 **Data Cleaning and statistical analysis**

28  
29 Due to the data being collected under service level conditions by non-researchers,  
30  
31 comprehensive cleaning procedures were undertaken to ensure data quality. Outliers for  
32  
33 anthropometric measurements were identified from visual analysis of histograms and  
34  
35 scatterplots. Visual analysis enabled identification of seven observations that were  
36  
37 inconsistent with other observations in the data set. After comparison to reference growth  
38  
39 charts, these seven data sets were excluded due to biologically unlikely increases in height  
40  
41 of over 5.5 cm over the course of the pre and post measurement sessions. Participants were  
42  
43 excluded from the activity analysis if the addition of reported daily physical activity and  
44  
45 sedentary behaviour exceeded 16 hours, resulting in seven data sets being excluded.  
46  
47

48  
49 Variable distribution was checked using the Kruskal-Wallis test for normality. Paired sample  
50  
51 t-tests were employed to assess mean differences in the outcome variables from baseline to  
52  
53 3 months (end of intervention). Changes in the proportions for fruit and vegetable intake from  
54  
55 baseline to the end of the intervention were assessed using the McNemar’s test. Baseline  
56  
57 differences for those who did and did not complete post programme measurements were  
58  
59  
60

1  
2  
3 examined using independent sample t-tests. Similarly, effects of gender pre-post programme  
4 were examined using independent sample t-tests. Statistical significance was set at  $P <$   
5  
6 0.05. All analyses were conducted using SPSS 18.0 for Windows (SPSS, Chicago, IL).  
7  
8  
9

## 10 **RESULTS**

### 11 **Recruitment**

12  
13 Four hundred and forty children participated in MEND 5-7 programmes across 37 UK  
14  
15 locations.  
16  
17  
18  
19

### 20 **Baseline demographic and anthropometric characteristics**

21  
22 Fifty-eight percent were female, and 79% of participants were obese ( $BMI \geq 98^{\text{th}}$  centile).  
23  
24 Thirty-three percent of children were from non-white ethnic backgrounds with 57% reporting  
25  
26 they did not own their home (Table 1).  
27  
28  
29

### 30 **Completers vs. non completers**

31  
32 There were no significant differences in baseline demographic and anthropometric  
33  
34 characteristics between children with complete sets of measurement data and those without.  
35  
36 Significant differences were evident in baseline comparisons of physical activity levels ( $15.0$   
37  
38  $\pm 8.9$  hours/week completers vs.  $19.3 \pm 13.7$  hours/week non completers,  $P < 0.01$ ). All other  
39  
40 outcome measures were not significantly different at baseline.  
41  
42  
43  
44  
45

### 46 **Attendance and retention**

47  
48 Attendance data was available for 81% of participants. Mean attendance for the programme  
49  
50 was 73% and retention rate (based on children attending at least 7 sessions) was 70%.  
51  
52  
53

### 54 **Outcome measures**

55  
56 Within subject differences in anthropometric, psychosocial and activity measures pre and  
57  
58 post intervention are shown in Table 2. Significant reductions in BMI, BMI z-score, waist  
59  
60

1  
2  
3 circumference, waist z-score and child total difficulties score (all  $P < 0.0001$ ) post  
4 intervention were noted. Positive changes were also observed for TV time, sedentary activity  
5 ( $P < 0.0001$ ) and physical activity ( $P < 0.01$ ). Significant increases were observed in all  
6 parenting self-efficacy domains and the proportion of children and parents eating at least five  
7 fruit and vegetables per day (all  $P < 0.0001$ ). There were no gender differences in any of the  
8 study outcomes.  
9  
10  
11  
12  
13  
14

## 15 16 17 DISCUSSION

18 This study examined outcomes following participation in the MEND programme for children  
19 aged 5-7 years old. Positive changes were observed for~~The intervention demonstrated~~  
20 ~~positive effects on~~ children's weight status, diet and activity levels and emotional well-being.  
21  
22 Parents also reported an increase in self-efficacy in relation to their parenting role.  
23  
24  
25  
26  
27

28  
29 Most of the outcome literature on child weight management programmes has been reported  
30 under trial conditions. Outcomes reported in studies of GP-led behavioural treatment of  
31 individual families (LEAP intervention [25]) and in generic parenting programmes unmodified  
32 to deal with the specific needs of obese and overweight children (Triple P) have shown no  
33 significant reductions in measures of degree of obesity. A version of the Triple P programme  
34 specifically adapted for obesity (Lifestyle Triple P) showed a reduction of -0.11 at 20 weeks  
35 [26], the HICKUPS study of a multicomponent group-based parenting intervention reported a  
36 reduction of -0.36 at 6 months and the PEACH study of a parent-only group intervention  
37 showed a reduction of -0.26 at 6 months [27, 28].  
38  
39  
40  
41  
42  
43  
44  
45  
46  
47

48  
49 In the current study, children with complete sets of measurement data had a significant  
50 reduction in BMI z-score of -0.20 after ten weeks. The results presented here were similar to  
51 the unpublished three months data (-0.20) for children taking part in the randomised  
52 controlled trial of the MEND programme for 7 to 13 year old children [29] and it's national  
53 service level evaluation (-0.18) [30]. Although not directly comparable to the treatment  
54  
55  
56  
57  
58  
59  
60

1  
2  
3 effects reported in experimental studies using intention-to-treat analysis this study suggests  
4 that community level interventions delivered under conditions of normal service delivery may  
5 achieve similar results to those obtained in clinical trials.  
6  
7  
8  
9

10  
11 Generally, interventions that produce greater treatment effects are more intense and involve  
12 relatively higher levels of contact time [31]. The US preventive services task force (USPSTF)  
13 conclude that low intensity interventions – defined as those involving less than 25 hours  
14 direct professional contact time – are insufficient to have a positive impact on weight-status  
15 in obese and overweight children. The MEND 5-7 programme consists of 17.5 hours of face-  
16 to-face contact time and demonstrated significant reductions in zBMI for the 62% of children  
17 with complete sets of measurement data. Contrary to USPTS recommendations this  
18 suggests that clinically meaningful outcomes may be achievable by low intensity  
19 interventions. (-0.20) comparable to interventions with much greater contact time.  
20  
21  
22  
23  
24  
25  
26  
27  
28  
29

30  
31 MEND 5-7 has been designed to be delivered by community-based, non-obesity specialists  
32 in contrast to other studies that have used highly skilled professionals to deliver the  
33 intervention [27, 28]. A large proportion of childhood obesity interventions employ intensive  
34 programmes involving specialist dieticians and other health professionals [32]. Childhood  
35 obesity interventions are significantly more expensive when skilled professionals and  
36 additional contact hours are employed. In an increasingly resource-constrained public-sector  
37 environment, these factors might limit the potential reach of evidence-based programmes  
38 [32]. The development of a clinically effective, low-intensity programme using non-specialist,  
39 community-based delivery staff could be a crucial strategy to meet the needs of younger  
40 children who are already overweight. The present results suggest that clinically meaningful  
41 outcomes may be achievable by low intensity interventions delivered by non-specialist staff.  
42 Further research would be desirable to explore whether these initially promising data could  
43 be independently replicated ~~such a model is feasible and effective when implemented~~ under  
44  
45  
46  
47  
48  
49  
50  
51  
52  
53  
54  
55  
56  
57  
58  
59  
60

1  
2  
3 service level conditions ~~and suggest that MEND 5-7 may be a good candidate for large scale~~  
4 ~~implementation.~~  
5  
6  
7

8  
9 The UK Department of Health physical activity guidelines specify that children and young  
10 people (5-18 years old) should engage in 60 minutes of activity per day whilst minimising  
11 sedentary behaviours [33]. Sedentary behaviours - in particular, time spent watching  
12 television - are associated with metabolic risk factors in children [34] and have been shown  
13 to predict BMI in early adulthood [35]. Independent of TV viewing time, higher levels of  
14 sedentary behaviours have been shown to lower levels of physical activity in children [36].  
15  
16  
17  
18  
19

20  
21  
22 There is also evidence that participation in physical activity leads to health benefits [37] and  
23 lowers levels of overweight and obesity in children [38]. In this study, participation in MEND  
24 5-7 ~~produced~~ was associated with significant, positive changes in physical activity levels ( $P$   
25  $< 0.01$ ), TV viewing time and sedentary activity levels ( $P < 0.0001$ ). Parents reported  
26 children on the programme had reduced sedentary behaviour by an average of 4.1 hours, of  
27 which 3.4 hours was television viewing, and increased their physical activity levels by 2.9  
28 hours per week. Such reductions in sedentary activity and increase in physical activity during  
29 participation in the programme is very encouraging.  
30  
31  
32  
33  
34  
35  
36  
37  
38  
39  
40

41  
42 Some limitations of the study should be acknowledged. Only 62% of participants who started  
43 the programme completed post programme measurements. This level of completion is not  
44 atypical for a pilot study or reports of service-level implementation [39, 40] but may be a  
45 source of bias that could lead to an overestimation of treatment effect. Statistical analyses  
46 revealed that there were limited differences between those participants that completed the  
47 programme and those who did not. The data presented here are uncontrolled data  
48 representing the short-term impact of the intervention for children with complete sets of  
49 measurement data. Controlled studies of the impact beyond the ten week programme are  
50 needed to establish whether the present results are sustained and more effective than no or  
51  
52  
53  
54  
55  
56  
57  
58  
59  
60

1  
2  
3 an alternative intervention. Whilst it is well documented that subjective measures of physical  
4 activity over-report when compared to more accurate objectively measured physical activity  
5 [41], subjective measurement can be a useful and cost effective tool when employed in a  
6 community-based programme if it is not feasible to obtain objective measurements [42]. The  
7 improvements found in physical activity and sedentary behaviours require supporting  
8 evidence using objective measurement.  
9  
10  
11  
12  
13  
14  
15  
16  
17

## 18 CONCLUSION

19  
20 Participation in The the MEND 5-7 programme was associated with appears to have had  
21 beneficial changes effects of physical, behavioural and psychological outcomes for children  
22 with complete sets of measurement pre-post data, when implemented in UK community  
23 settings under service level conditions. High attendance and retention rates suggest the  
24 programme was acceptable to families. Coupled with a scalable delivery model using non-  
25 obesity specialists, the se preliminary findings presented warrant further evaluation in a in a  
26 formal trial to to establish if outeomes the observed outcomes would have occurred in the  
27 absence of intervention, are replicable across varying ethnic and socioeconomic groups, are  
28 sustainable and are and sustained, cost-effective. Further, process evaluation of programme  
29 implementation will also establish if the delivery model, using non-obesity specialists, can  
30 provide a scalable and suitable care pathway for families of overweight and obese children  
31 on a national level.  
32  
33  
34  
35  
36  
37  
38  
39  
40  
41  
42  
43  
44  
45  
46  
47

## 48 Acknowledgements

49  
50 We would like to thank Dr Venediktos Kapetanakis for his statistical advice. We would also  
51 like to thank all the families who took part in the MEND 5-7 programme.  
52  
53  
54

## 55 Funding



1  
2  
3 This ~~evaluation research~~ received no specific grant from any funding agency. Researchers  
4 (authors) were all funded as employees of MEND Central Ltd. Programmes were primary  
5 funded by UK Primary Care Trusts and Local Authorities (approximately 80% and 10%,  
6 respectively). Additional programmes were funded from a variety of sources including local  
7 Leisure Providers and Private Sector Companies.  
8  
9  
10  
11  
12  
13

#### 14 **Data Sharing Statement**

15  
16 No additional data available.  
17

#### 18 **Ethical Approval**

19  
20 This study is a service evaluation and not within the remit of UK Ethics Committee  
21 governance. Parents consented to take part in the study and for use of their anonymised  
22 data.  
23  
24  
25  
26  
27  
28

#### 29 **Contributors**

30  
31 L Smith performed statistical analysis and contributed to writing the paper. P Chadwick co-  
32 developed the intervention and contributed to writing the paper, interpretation and analysis of  
33 results. D Radley contributed to writing the paper and statistical analysis. M Kolotourou  
34 critically reviewed all parts of the paper and assisted in the interpretation and analysis of the  
35 results. C Gammon contributed to the interpretation of the results and critically reviewed all  
36 parts of the paper. J Rosborough co-developed the intervention and critically reviewed all  
37 parts of the paper. P Sacher co-developed the intervention, contributed to the interpretation  
38 of the results and writing the paper and critically reviewed all parts of the paper. All authors  
39 approved the final draft of the paper.  
40  
41  
42  
43  
44  
45  
46  
47  
48  
49  
50

#### 51 **Competing interests**

52  
53 Dr. Lindsey Smith, Dr. Duncan Radley, Catherine Gammon and Jennifer Rosborough are  
54 employed full-time at MEND. Dr. Paul Chadwick is currently employed part-time as Clinical  
55  
56  
57  
58  
59  
60

1  
2  
3  
4  
5  
6  
7  
8  
9  
10  
11  
12  
13  
14  
15  
16  
17  
18  
19  
20  
21  
22  
23  
24  
25  
26  
27  
28  
29  
30  
31  
32  
33  
34  
35  
36  
37  
38  
39  
40  
41  
42  
43  
44  
45  
46  
47  
48  
49  
50  
51  
52  
53  
54  
55  
56  
57  
58  
59  
60

Director at MEND. Maria Kolotourou is employed part-time at MEND. Paul Sacher is currently employed as a Senior Research Fellow at the UCL Institute of Child Health as well as Chief Research and Development Officer at MEND. Dr Venediktos Kapetanakis serves as a consultant statistician to MEND.

For peer review only

## REFERENCES

1. Abrams, P. and L.E. Levitt Katz, *Metabolic effects of obesity causing disease in childhood*. *Curr Opin Endocrinol Diabetes Obes*, 2011. **18**(1): p. 23-7.
2. Reilly, J.J., et al., *Health consequences of obesity*. *Arch Dis Child*, 2003. **88**(9): p. 748-52.
3. Olds, T., et al., *Evidence that the prevalence of childhood overweight is plateauing: data from nine countries*. *Int J Pediatr Obes*, 2011. **6**(5-6): p. 342-60.
4. NHS, *National Child Measurement Programme*, 2011, Crown copyright.
5. Chomitz, V.R., et al., *Healthy Living Cambridge Kids: a community-based participatory effort to promote healthy weight and fitness*. *Obesity (Silver Spring)*, 2010. **18 Suppl 1**: p. S45-53.
6. Waters, E., et al., *Interventions for preventing obesity in children*. *Cochrane Database Syst Rev*, 2011. **12**: p. CD001871.
7. NICE *National Institute for Health and Clinical Excellence (NICE) guidance. Obesity: the prevention, identification, assessment and management of overweight and obesity in adults and children*. 2006.
8. Barlow, S.E., *Expert committee recommendations regarding the prevention, assessment, and treatment of child and adolescent overweight and obesity: summary report*. *Pediatrics*, 2007. **120 Suppl 4**: p. S164-92.
9. Aicken, C., L. Arai, and H. Roberts, *Schemes to promote healthy weight among obese and overweight children in England*. EPPI-Centre report, Social Science Research Unit, 2008: p. 1-37.
10. Cross-Government Obesity Unit, *Healthy Weight, Healthy Lives: Child weight management programme and training providers framework*. 2009.
11. Cole, T.J., J.V. Freeman, and M.A. Preece, *Body mass index reference curves for the UK, 1990*. *Arch Dis Child*, 1995. **73**(1): p. 25-9.
12. NICE *Parent-training/education programmes in the management of children with conduct disorders. Technology appraisals guidance 102*. 2006.
13. Robinson, T.N., *Behavioural treatment of childhood and adolescent obesity*. *Int J Obes Relat Metab Disord*, 1999. **23 Suppl 2**: p. S52-7.
14. Levine, M., D.D. Perkins, and D.V. Perkins, *Principles of community psychology: Perspectives and applications* 3rd ed. 2005, New York: Oxford University Press.
15. Leung, W.C., *Competency based medical training: review*. *BMJ*, 2002. **325**(7366): p. 693-6.
16. National Obesity Observatory *Standard evaluation framework*. 2009.
17. Burdette, H.L. and R.C. Whitaker, *Neighborhood playgrounds, fast food restaurants, and crime: relationships to overweight in low-income preschool children*. *Prev Med*, 2004. **38**(1): p. 57-63.
18. Lohman, T., A.F. Roche, and R. Martorell, *Anthropometric standardization reference manual*, 1988, Human Kinetics Books, Champaign, IL
19. Rudolf, M.C., J. Walker, and T.J. Cole, *What is the best way to measure waist circumference?* *Int J Pediatr Obes*, 2007. **2**(1): p. 58-61.
20. McCarthy, H.D., K.V. Jarrett, and H.F. Crawley, *The development of waist circumference percentiles in British children aged 5.0-16.9 y*. *Eur J Clin Nutr*, 2001. **55**(10): p. 902-7.
21. Pan H, C.T. *LMSgrowth: a Microsoft Excel add-in to access growth references based on the LMS method. Version 2.74*.
22. Sweetman, C., et al., *Characteristics of family mealtimes affecting children's vegetable consumption and liking*. *J Am Diet Assoc*, 2011. **111**(2): p. 269-73.
23. Kendall, S. and L. Bloomfield, *Developing and validating a tool to measure parenting self-efficacy*. *J Adv Nurs*, 2005. **51**(2): p. 174-81.
24. Goodman, R., *The Strengths and Difficulties Questionnaire: a research note*. *J Child Psychol Psychiatry*, 1997. **38**(5): p. 581-6.

- 1
  - 2
  - 3
  - 4
  - 5
  - 6
  - 7
  - 8
  - 9
  - 10
  - 11
  - 12
  - 13
  - 14
  - 15
  - 16
  - 17
  - 18
  - 19
  - 20
  - 21
  - 22
  - 23
  - 24
  - 25
  - 26
  - 27
  - 28
  - 29
  - 30
  - 31
  - 32
  - 33
  - 34
  - 35
  - 36
  - 37
  - 38
  - 39
  - 40
  - 41
  - 42
  - 43
  - 44
  - 45
  - 46
  - 47
  - 48
  - 49
  - 50
  - 51
  - 52
  - 53
  - 54
  - 55
  - 56
  - 57
  - 58
  - 59
  - 60
25. McCallum, Z., et al., *Outcome data from the LEAP (Live, Eat and Play) trial: a randomized controlled trial of a primary care intervention for childhood overweight/mild obesity*. *Int J Obes (Lond)*, 2007. **31**(4): p. 630-6.
26. West, F., et al., *Randomised clinical trial of a family-based lifestyle intervention for childhood obesity involving parents as the exclusive agents of change*. *Behav Res Ther*, 2010. **48**(12): p. 1170-9.
27. Okely, A.D., et al., *Multi-site randomized controlled trial of a child-centered physical activity program, a parent-centered dietary-modification program, or both in overweight children: the HIKCUPS study*. *J Pediatr*, 2010. **157**(3): p. 388-94, 394 e1.
28. Magarey, A.M., et al., *A parent-led family-focused treatment program for overweight children aged 5 to 9 years: the PEACH RCT*. *Pediatrics*, 2011. **127**(2): p. 214-22.
29. Sacher, P.M., et al., *Randomized controlled trial of the MEND program: a family-based community intervention for childhood obesity*. *Obesity (Silver Spring)*, 2010. **18 Suppl 1**: p. S62-8.
30. Sacher, P., et al., *Evaluating the effectiveness of the scale-up and spread of the MEND 7-13 childhood obesity program: UK national data (2007-2010)*. *Obesity (Silver Spring)*, 2011. **19**(S1): p. S52.
31. Whitlock, E.P., et al., *Effectiveness of weight management interventions in children: a targeted systematic review for the USPSTF*. *Pediatrics*, 2010. **125**(2): p. e396-418.
32. Taveras, E.M., et al., *Randomized controlled trial to improve primary care to prevent and manage childhood obesity: the High Five for Kids study*. *Arch Pediatr Adolesc Med*, 2011. **165**(8): p. 714-22.
33. DoH, *Start Active, Stay Active - A report on physical activity for health from the four home countries' Chief Medical Officers*. Crown Copyright, 2011.
34. Ekelund, U., et al., *TV viewing and physical activity are independently associated with metabolic risk in children: the European Youth Heart Study*. *PLoS Med*, 2006. **3**(12): p. e488.
35. Hancox, R.J., B.J. Milne, and R. Poulton, *Association between child and adolescent television viewing and adult health: a longitudinal birth cohort study*. *Lancet*, 2004. **364**(9430): p. 257-62.
36. Jago, R., et al., *Sedentary behavior, not TV viewing, predicts physical activity among sedentary 3-to 7-year-old children*. *Pediatric Exercise Science*, 2005. **17**: p. 364-376.
37. Janssen, I. and A.G. Leblanc, *Systematic review of the health benefits of physical activity and fitness in school-aged children and youth*. *Int J Behav Nutr Phys Act*, 2010. **7**: p. 40.
38. Hills, A.P., L.B. Andersen, and N.M. Byrne, *Physical activity and obesity in children*. *Br J Sports Med*, 2011. **45**(11): p. 866-70.
39. Robertson, W., et al., *Pilot of "Families for Health": community-based family intervention for obesity*. *Arch Dis Child*, 2008. **93**(11): p. 921-6.
40. Watson, P.M., et al., *A whole family approach to childhood obesity management (GOALS): relationship between adult and child BMI change*. *Ann Hum Biol*, 2011. **38**(4): p. 445-52.
41. Adamo, K.B., et al., *A comparison of indirect versus direct measures for assessing physical activity in the pediatric population: a systematic review*. *Int J Pediatr Obes*, 2009. **4**(1): p. 2-27.
42. van Sluijs, E.M., A.M. McMinn, and S.J. Griffin, *Effectiveness of interventions to promote physical activity in children and adolescents: systematic review of controlled trials*. *Br J Sports Med*, 2008. **42**(8): p. 653-7.

**Table 1.** Baseline demographic and anthropometric characteristics

|                             | % (n <sup>1</sup> ) or mean (SD) |
|-----------------------------|----------------------------------|
| Gender                      |                                  |
| Males                       | 42.0 % (185)                     |
| Females                     | 58.0 % (255)                     |
| Ethnicity                   |                                  |
| White – British             | 67.2 % (275)                     |
| Black                       | 6.6 % (27)                       |
| Asian                       | 19.6 % (80)                      |
| Mixed                       | 5.1 % (21)                       |
| Other                       | 1.5 % (6)                        |
| House ownership             |                                  |
| Owner occupied              | 43.2 % (162)                     |
| Private rented              | 25.9 % (97)                      |
| Social rented               | 30.1 % (113)                     |
| Other                       | 0.8 % (3)                        |
| Age (years)                 | 6.1 (0.8)                        |
| Weight (kg)                 | 33.0 (7.9)                       |
| Height (cm)                 | 120.7 (7.7)                      |
| BMI (kg/m <sup>2</sup> )    | 22.5 (3.6)                       |
| BMI z-score                 | 2.86 (0.91)                      |
| Waist circumference (cm)    | 70.4 (9.5)                       |
| Waist circumference z-score | 3.13 (1.09)                      |

<sup>1</sup>n = 440, baseline n may vary due to missing data and data cleaning procedures.

**Table 2.** Within subject changes at pre and post intervention

|                                              |                | Pre         | Post        | Difference             |         |
|----------------------------------------------|----------------|-------------|-------------|------------------------|---------|
|                                              | n <sup>1</sup> | Mean (SD)   | Mean (SD)   | Mean (CI)              | P       |
| <b>Anthropometry</b>                         |                |             |             |                        |         |
| BMI (kg/m <sup>2</sup> )                     | 274            | 22.5 (3.6)  | 22.1 (3.7)  | -0.5 (-0.6 to -0.4)    | <0.0001 |
| BMI z-score                                  | 274            | 2.86 (0.90) | 2.66 (0.94) | -0.20 (-0.23 to -0.17) | <0.0001 |
| Waist circumference (cm)                     | 267            | 70.9 (9.9)  | 69.9 (10.0) | -0.9 (-1.3 to -0.5)    | <0.0001 |
| Waist circumference z-score                  | 267            | 3.16 (1.10) | 2.96 (1.14) | -0.20 (-0.25 to -0.15) | <0.0001 |
| <b>Psychosocial indices</b>                  |                |             |             |                        |         |
| Child total difficulties score (range 0-40)  | 212            | 10.8 (5.7)  | 9.2 (5.8)   | -1.6 (-2.2 to -0.9)    | <0.0001 |
| Play and enjoyment score (range 0-60)        | 240            | 48.6 (10.4) | 51.6 (9.1)  | 3.1 (1.9 to 4.2)       | <0.0001 |
| Discipline and boundaries score (range 0-60) | 235            | 42.0 (11.9) | 47.3 (9.7)  | 5.3 (4.0 to 6.6)       | <0.0001 |
| Learning and knowledge score (range 0-60)    | 238            | 48.7 (9.2)  | 51.1 (8.3)  | 2.5 (1.3 to 3.7)       | <0.0001 |
| <b>Activity indices</b>                      |                |             |             |                        |         |
| Sedentary activity (hours/week)              | 168            | 21.6 (12.8) | 17.5 (10.8) | -4.1 (-6.1 to -2.2)    | <0.0001 |
| Physical activity (hours/week)               | 168            | 15.1 (8.8)  | 18.0 (9.4)  | 2.9 (1.2 to 4.7)       | <0.01   |
| TV time (hours/week)                         | 168            | 16.6 (10.9) | 13.2 (9.0)  | -3.4 (-5.0 to -1.8)    | <0.0001 |

<sup>1</sup> numbers vary due to missing data and data cleaning procedures
